# Supplementary material for: Clinical and prognostic relevance of CXCL12 expression in acute myeloid leukemia
Source: PeerJ. 2021 Jul 20;9:e11820. doi: 10.7717/peerj.11820 (PMC8300536; doi:10.7717/peerj.11820)
Supplement: Supplemental Information 7 — A total of 261 cytokine and cytokine receptor genes are listed. [file peerj-09-11820-s007.xlsx]

## Sheet: cytokine and cytokine receptors
Gene symbol
CXCL5
IL12RB2
IFNAR2
IL22RA2
ILF2
TNFRSF21
CXCL3
CXCL1
CCL20
TGFA
IL34
CCL18
ILF3
CXCL6
CSF2
BMP2
IL1R2
IL8
IL1RL2
IL1F5
CXCL16
IL27RA
IL1A
TNFRSF13C
CCL13
IL2RA
IL20RB
CX3CL1
CCL7
IL32
IL1F9
TNF
IL4I1
IL15RA
CXCL10
TNFRSF11A
CCL24
IL12A
CCR1
IL18R1
IL10RB
TNFRSF10D
TNFRSF9
IL31RA
IL23A
TNFAIP3
IFNA10
IFNG
CCL4
IL1RAP
CCL8
IFNGR1
IFNA4
CCL2
CXCR4
TNFRSF8
CXCL2
TGFBI
TNFSF13B
CCL25
IL18RAP
IL1B
TNFSF9
IL18BP
CCL1
CSF2RB
IL6
CCL5
IL2RG
IFNGR2
TNFSF12-TNFSF13
IL12RB1
CXCL11
BMP6
IL17F
TNFRSF25
IL7
IL22RA1
CXCL13
BMP5
CXCR6
TNFRSF4
IL17C
IL17RD
TNFRSF12A
IL26
IL21R
XCL1
CCR9
IFNE
TNFRSF1B
CCL3
TNFRSF10B
IL2RB
XCL2
IL22
IL10
CSF2RA
TNFSF14
BMP7
TNFAIP2
CXCL9
CXCR5
TNFAIP8
IL17RA
IL1F7
IL13
CCL17
CXCR2P1
IL28RA
BMP1
IL27
CCR3
IL15
ILKAP
TNFSF15
TNFAIP8L2
IL11
IFNK
CCR5
CXCR3
IL18
IL3
IL17RE
TNFRSF17
IL10RA
IL7R
TNFRSF1A
CCL26
CCR7
IL6R
IL29
CCL23
CCR2
IL17A
TNFRSF10A
IL13RA2
TNFRSF6B
CCR8
CSF1R
IL12B
TGFB2
CCL4L2
IFNB1
TNFRSF13B
IL1F8
IL1F10
IL21
IFNA8
CSF1
BMP8B
IL23R
CCL19
TNFSF11
BMPR1A
IL28A
IL3RA
IL17RC
CCRN4L
IL2
CXCR2
CCL28
CCL27
CCR4
BMP10
CCL11
IL4R
TNFSF18
IFNA13
CCL22
BMP3
IL17B
IL4
TGFBR1
IL1RN
CCRL2
BMP15
IFNA1
TNFRSF11B
CSF3
IFNA7
TNFSF8
IL5
TGFB3
IL20
IL13RA1
IL6ST
BMP4
ILDR1
EPOR
CXCL14
BMPR1B
IL20RA
TNFSF13
CX3CR1
TPO
CSF3R
CCL14
TNFSF12
IL19
TNFRSF10C
TNFAIP1
CXCL12
IL1RL1
IL24
TNFSF10
IL1RAPL2
BMPR2
TNFRSF19
TGFB1I1
CCL16
ILK
IL25
CCL3L3
IL17REL
IL1RAPL1
CXCR1
CCL15
TNFAIP8L1
TNFRSF14
TGFBR3
TNFAIP8L3
EPO
TNFRSF18
TNFSF4
IL9R
TGFB1
BMPER
BMP8A
ILDR2
CCL14-CCL15
TNFAIP6
BMP2K
CCL3L1
IL17RB
IL5RA
ILVBL
IFNW1
CCL21
IL9
IFNAR1
IFNA14
IFNA21
TGFBR2
IL16
IFNA17
IFNA2
IFNA16
TGFBRAP1
IFNA6
IL1F6
IL31
CCR10
CCR6
IL17D
IFNA5
IL1R1
IL11RA
IL33
IL28B
CXCL17
