# Supplementary material for: Clinical and prognostic relevance of CXCL12 expression in acute myeloid leukemia
Source: PeerJ. 2021 Jul 20;9:e11820. doi: 10.7717/peerj.11820 (PMC8300536; doi:10.7717/peerj.11820)
Supplement: Supplemental Information 8 — All genes were screened with the difference considered significant if adjusted p-value < 0.05 and |logFC| ＞ 0. [file peerj-09-11820-s008.xlsx]

## Sheet: Sheet 1
logFC	AveExpr	t	P.Value	adj.P.Val	B	gene
-654.343	179.915	-11.3802	8.87025e-21	2.22643e-18	18.9601	CXCL12
-194.316	58.5579	-11.254	1.77717e-20	2.23035e-18	18.6442	CCL15
-174.278	49.5653	-6.71956	6.55579e-10	3.29101e-08	6.38938	CCL2
-300.985	81.3818	-6.49446	1.99516e-09	7.15408e-08	5.77636	CCL8
-541.247	310.1	-4.92386	2.74925e-06	4.60041e-05	1.70516	IL18RAP
-23.4836	13.9587	-4.90666	2.95749e-06	4.63956e-05	1.66337	CSF2RB
-12.7249	4.78678	-4.61849	9.81834e-06	0.00012322	0.975259	CXCL9
-42.9029	54.3017	-4.58621	1.11995e-05	0.000133861	0.899641	IL1F7
-2238.16	3205.96	-4.47395	1.76213e-05	0.000176918	0.639076	CSF3R
-8.99129	4.97355	-4.42159	2.17163e-05	0.000209646	0.518869	IL33
-66.0836	55.505	-4.39055	2.45616e-05	0.000228332	0.448017	TNFRSF19
-888.804	3611.25	-4.34813	2.90368e-05	0.000251319	0.351673	ILF2
-163.347	110.879	-4.21621	4.85403e-05	0.00039025	0.0557767	EPOR
-24.3957	18.2512	-4.13641	6.59011e-05	0.000501248	-0.120371	TGFA
-10.1968	3.54463	-4.09712	7.6503e-05	0.000564772	-0.206321	CCL13
-42.6699	20.7653	-4.07068	8.45327e-05	0.00060622	-0.263831	CCR3
-69.8069	168.103	-3.7597	0.000264715	0.00166109	-0.921433	IL16
-16.5865	44.8339	-3.00881	0.00319904	0.0160592	-2.3492	TNFAIP1
-6.88276	0.464463	-2.91435	0.00425604	0.0197827	-2.51116	IL4
-205.033	760.648	-2.9046	0.0043817	0.0199965	-2.52764	ILF3
-7.59703	-0.628099	-2.89379	0.00452496	0.0202815	-2.54585	CXCL5
-145.959	398.793	-2.77527	0.00640323	0.0281532	-2.7419	TNFAIP8
-4.57996	-3.03884	-2.70704	0.00778317	0.0325596	-2.85166	IL12B
-6.89534	2.67769	-2.6696	0.0086502	0.0355934	-2.91091	BMP4
-793.818	878.386	-2.63545	0.00951644	0.0385262	-2.96436	TGFBI
-22.8415	40.8331	-2.52698	0.0128107	0.0487194	-3.1302	IL17D
110.092	109.061	7.20659	5.60457e-11	4.68916e-09	7.72913	TNFRSF10A
4233.2	10653	6.80794	4.21698e-10	2.64615e-08	6.63127	IL18
416.503	562.296	6.59245	1.2315e-09	5.15177e-08	6.04262	TNFRSF10B
229.556	192.499	6.19866	8.39485e-09	2.63388e-07	4.979	IL1RAP
151.242	168.001	6.04413	1.7563e-08	4.83868e-07	4.56686	TNFAIP8L1
403.917	434.24	6.0245	1.92776e-08	4.83868e-07	4.51474	TGFBRAP1
108.118	116.65	5.94694	2.78122e-08	6.34624e-07	4.30938	IL12RB1
145.39	130.709	5.85955	4.19135e-08	8.76692e-07	4.07914	IL3RA
1108.92	2299.27	5.58917	1.46186e-07	2.82252e-06	3.37486	CSF2RA
5608.12	20386.8	5.28857	5.64809e-07	1.01262e-05	2.60824	CCR6
1131.95	2219.42	4.86289	3.55876e-06	5.2544e-05	1.5574	IL10
383.919	700.36	4.74845	5.74648e-06	8.01315e-05	1.28274	IL27RA
55.5254	51.8967	4.69148	7.27557e-06	9.61141e-05	1.14736	TNFSF9
15.6967	22.243	4.56397	1.22587e-05	0.000139861	0.847712	BMP8B
112.17	156.936	4.54775	1.3091e-05	0.000142862	0.809958	BMP1
411.459	712.579	4.52827	1.41635e-05	0.000148127	0.764688	IL11RA
828.383	1541.75	4.37236	2.63925e-05	0.00023659	0.406636	IL17RD
331.727	358.052	4.30766	3.40319e-05	0.000284734	0.260284	TNFRSF25
272.103	551.332	4.20981	4.97529e-05	0.00039025	0.0415635	TNFSF14
164.695	309.794	4.06254	8.71649e-05	0.000607733	-0.2815	IL18BP
186.788	300.44	4.02605	9.9952e-05	0.000678053	-0.360377	TNFSF15
8397.92	13987.6	3.93438	0.000140466	0.000927818	-0.556443	IL8
1738.65	1952.3	3.82612	0.000208507	0.00134193	-0.78399	TNFAIP3
306.82	264.623	3.68554	0.00034437	0.00210822	-1.07285	TNFRSF4
39.9332	63.4636	3.64077	0.000402946	0.00240808	-1.16323	IL2RG
13.8065	9.99835	3.54067	0.000569761	0.00332581	-1.36239	IL6ST
52.1732	56.0678	3.48217	0.000695447	0.00396721	-1.47688	TNFSF8
658.272	615.682	3.38225	0.000972295	0.00542325	-1.66914	CXCL2
4111.79	3760.19	3.29687	0.00128767	0.00702618	-1.83007	CCL3L3
74.7719	61.8058	3.21852	0.00165889	0.00885915	-1.97494	IL2RA
117.587	221.961	3.0805	0.00256481	0.0134118	-2.22351	CCRN4L
33.9542	32.7132	3.0125	0.00316315	0.0160592	-2.34279	CXCR3
5.96487	0.949587	2.97438	0.00355253	0.017484	-2.40872	TNFSF11
2810.93	3531.57	2.96169	0.00369162	0.0177861	-2.43051	CCL5
602.636	909.126	2.956	0.00375562	0.0177861	-2.44026	IL13RA1
1992.81	1818.18	2.76977	0.00650552	0.0281532	-2.75082	CCL3
84.5377	144.076	2.75782	0.00673315	0.0286444	-2.77019	IL12A
432.385	384.954	2.60546	0.0103406	0.0411981	-3.0108	CCR7
1382.2	1188.53	2.55964	0.0117248	0.0457418	-3.08089	CCL3L1
5.40867	4.71653	2.55588	0.0118455	0.0457418	-3.0866	CCL21
