# Supplementary material for: Clinical and prognostic relevance of CXCL12 expression in acute myeloid leukemia
Source: PeerJ. 2021 Jul 20;9:e11820. doi: 10.7717/peerj.11820 (PMC8300536; doi:10.7717/peerj.11820)
Supplement: Supplemental Information 9 — All genes were screened with the difference considered significant if adjusted p-value < 0.05 and |logFC| ＞ 0. [file peerj-09-11820-s009.xlsx]

## Sheet: Sheet 1
logFC
