# Supplementary material for: Clinical and prognostic relevance of CXCL12 expression in acute myeloid leukemia
Source: PeerJ. 2021 Jul 20;9:e11820. doi: 10.7717/peerj.11820 (PMC8300536; doi:10.7717/peerj.11820)
Supplement: Supplemental Information 10 [file peerj-09-11820-s010.xlsx]

## Sheet: GTEx
sampleCode	primarySite	CXCL12 expression (RNAseq)
GTEX-12WSC-0011-R7b-SM-5LU9L	Brain	7.44102
GTEX-14A6H-1026-SM-5SIAZ	Adipose Tissue	339.696
GTEX-13OW8-2326-SM-5L3I9	Esophagus	47.5904
GTEX-13111-0626-SM-5LZVR	Adipose Tissue	87.9432
GTEX-ZF2S-1126-SM-4WKHH	Esophagus	108.745
GTEX-11P82-1926-SM-5Q5AU	Nerve	125.288
GTEX-13QIC-0011-R1a-SM-5O9CJ	Brain	5.13086
GTEX-UJMC-1826-SM-3GADT	Muscle	8.41113
GTEX-ZYY3-0226-SM-5E45M	Adipose Tissue	108.053
GTEX-131XG-0126-SM-5K7UJ	Adipose Tissue	158.024
GTEX-YJ8A-0826-SM-5Q5A7	Blood Vessel	77.2627
GTEX-117XS-3126-SM-5GIDP	Brain	3.36102
GTEX-WQUQ-0126-SM-4OOSS	Adrenal Gland	24.0106
GTEX-WY7C-0006-SM-3NB3L	Blood	0.130996
GTEX-1122O-1926-SM-5EGIQ	Stomach	4.62098
GTEX-U3ZM-1126-SM-4DXUB	Colon	17.6611
GTEX-1117F-3026-SM-5GZYU	Salivary Gland	108.624
GTEX-ZTTD-1426-SM-4YCEX	Esophagus	69.6427
GTEX-XUYS-0226-SM-47JX1	Adipose Tissue	328.876
GTEX-13OW5-1126-SM-5J1NR	Heart	22.3903
GTEX-NL3H-0011-R10A-SM-2I3E9	Brain	4.6709
GTEX-RTLS-0826-SM-2TF5Q	Heart	90.1215
GTEX-13FXS-0011-R1a-SM-5K7U6	Brain	7.28082
GTEX-11P81-2526-SM-5GU6H	Muscle	11.4209
GTEX-13PDP-0726-SM-5L3HP	Skin	21.0012
GTEX-14BIM-0426-SM-5SI9N	Nerve	124.534
GTEX-RNOR-0826-SM-2TF5C	Heart	50.0709
GTEX-YECK-1726-SM-5IFI3	Esophagus	213.827
GTEX-117YX-2626-SM-5EQ53	Blood Vessel	68.5127
GTEX-YEC4-2126-SM-5IFJH	Skin	62.7003
GTEX-13FH7-0226-SM-5IFGG	Adrenal Gland	59.491
GTEX-PWOO-1226-SM-48TCO	Stomach	5.34096
GTEX-139T4-0426-SM-5J1OQ	Nerve	185.105
GTEX-UTHO-1026-SM-3GAF7	Breast	109.653
GTEX-ZV68-0008-SM-4YCCV	Skin	51.4393
GTEX-Y5LM-0726-SM-4VBRP	Lung	13.151
GTEX-XAJ8-0726-SM-47JY5	Colon	34.2516
GTEX-11NSD-1626-SM-5986U	Colon	80.5716
GTEX-11OF3-1326-SM-5N9FJ	Kidney	17.8915
GTEX-11ZUS-0926-SM-5FQSY	Esophagus	307.598
GTEX-ZC5H-2726-SM-5KLZW	Salivary Gland	268.709
GTEX-Q2AG-0011-R2A-SM-2HMIT	Brain	6.51109
GTEX-11LCK-1126-SM-5A5KC	Adipose Tissue	145.714
GTEX-YJ89-0011-R11a-SM-4SOKA	Brain	2.24093
GTEX-13W3W-2426-SM-5LU5B	Skin	33.7099
GTEX-TML8-1926-SM-32QOS	Skin	98.1829
GTEX-ZDXO-0011-R2b-SM-4WKFG	Brain	3.11105
GTEX-13NYC-0826-SM-5N9FP	Blood Vessel	37.8704
GTEX-R55F-1326-SM-2TF5F	Brain	5.98106
GTEX-R55D-1226-SM-48FE9	Esophagus	46.7307
GTEX-ZF29-1626-SM-4WKFJ	Small Intestine	52.1899
GTEX-ZTPG-1626-SM-5DUX2	Esophagus	6.53098
GTEX-WFG8-1726-SM-5CHTE	Colon	0.000999989
GTEX-ZA64-0926-SM-5HL7H	Adipose Tissue	80.9691
GTEX-ZYWO-1326-SM-5SI8X	Pancreas	21.9416
GTEX-11ZTT-2426-SM-5EQLS	Skin	115.953
GTEX-OOBK-0226-SM-2YUMF	Adipose Tissue	293.883
GTEX-WRHK-0226-SM-4MVOH	Pancreas	34.2801
GTEX-WWTW-0626-SM-4MVNS	Muscle	52.6514
GTEX-11DXY-1126-SM-5987W	Blood Vessel	257.513
GTEX-S32W-1526-SM-4AD6Z	Cervix Uteri	127.16
GTEX-11TT1-1826-SM-5EQLV	Skin	32.3501
GTEX-ZYVF-0926-SM-5E44J	Skin	25.0615
GTEX-ZPCL-1126-SM-4WWFE	Skin	11.6908
GTEX-OOBK-2626-SM-2HMKY	Thyroid	119.015
GTEX-1269C-0926-SM-5FQSR	Lung	28.3603
GTEX-13OVJ-0726-SM-5KM1W	Lung	64.6823
GTEX-YB5K-2026-SM-4VDT3	Skin	83.6098
GTEX-13O3Q-2426-SM-5IJBR	Skin	82.4187
GTEX-11NSD-0426-SM-5N9CR	Spleen	228.239
GTEX-131XH-0126-SM-5LZUY	Skin	162.794
GTEX-ZG7Y-1426-SM-4WWBM	Heart	55.9823
GTEX-ZDXO-2426-SM-5S2NJ	Adipose Tissue	784.756
GTEX-139TS-1426-SM-5IFJD	Liver	55.6226
GTEX-S32W-2026-SM-4AD6E	Breast	76.162
GTEX-S95S-0002-SM-3NM8K	Blood	0.431012
GTEX-11TT1-2226-SM-5GU6B	Testis	9.17113
GTEX-OHPK-0006-SM-2HMKH	Blood	0.061002
GTEX-13NYB-0011-R1b-SM-5KM4F	Brain	7.67092
GTEX-RWS6-0426-SM-47JXH	Blood Vessel	51.4393
GTEX-145MH-2326-SM-5O9AW	Testis	4.90108
GTEX-ZDYS-1726-SM-5HL4Y	Muscle	19.8711
GTEX-RNOR-0011-R7A-SM-2TF4V	Brain	7.31116
GTEX-12ZZX-0011-R5a-SM-5HL89	Brain	9.04111
GTEX-WFON-1026-SM-4LVMD	Esophagus	74.973
GTEX-11NSD-1026-SM-5N9BE	Testis	8.57122
GTEX-11LCK-0526-SM-5A5M9	Thyroid	50.2308
GTEX-PWN1-1626-SM-2S1OL	Muscle	15.9314
GTEX-145LU-0011-R3a-SM-5P9K2	Brain	3.71098
GTEX-131XH-0011-R6a-SM-5KM2G	Brain	3.06099
GTEX-132NY-2026-SM-5L3FM	Esophagus	421.913
GTEX-XGQ4-0526-SM-4AT6C	Heart	23.4904
GTEX-11EM3-2426-SM-59861	Skin	22.0316
GTEX-YEC3-0826-SM-4WWFP	Thyroid	49.45
GTEX-11DXZ-0226-SM-5EGGZ	Adrenal Gland	68.1622
GTEX-14BMV-0126-SM-5S2PO	Skin	70.2487
GTEX-11ONC-2726-SM-5N9DZ	Blood Vessel	286.621
GTEX-11EMC-2626-SM-59864	Muscle	21.3713
GTEX-XUZC-1626-SM-4BRVP	Breast	77.6815
GTEX-T5JW-1326-SM-4DM5G	Esophagus	11.2013
GTEX-ZAB5-1926-SM-5HL7O	Nerve	276.666
GTEX-131YS-2826-SM-5EQ47	Skin	203.093
GTEX-13O61-0926-SM-5IFFE	Esophagus	30.7817
GTEX-ZVP2-0005-SM-51MRK	Blood	0.220997
GTEX-ZV7C-0003-SM-4YCF6	Blood	0.521016
GTEX-XMD1-0826-SM-4AT52	Breast	207.577
GTEX-13PVQ-0126-SM-5SIB4	Skin	182.215
GTEX-O5YU-0008-SM-4E3I7	Skin	316.004
GTEX-13O21-3026-SM-5J2NI	Lung	28.3406
GTEX-13OW7-0011-R3a-SM-5O9DA	Brain	6.93118
GTEX-13SLW-0011-R8b-SM-5SI64	Brain	3.92094
GTEX-S4UY-1426-SM-4AD6Y	Cervix Uteri	573.56
GTEX-1122O-2126-SM-5EGIR	Skin	10.751
GTEX-QEG5-1826-SM-4R1JP	Adrenal Gland	72.5297
GTEX-WFJO-0926-SM-4LVM2	Small Intestine	33.5119
GTEX-WRHK-1126-SM-4MVOJ	Colon	85.6808
GTEX-YB5E-0426-SM-5IFHR	Spleen	155.428
GTEX-N7MS-0007-SM-2D7W1	Blood	0.541
GTEX-QXCU-0326-SM-2TC63	Thyroid	76.2624
GTEX-OHPK-0008-SM-4E3JL	Skin	164.176
GTEX-14BIN-0011-R10a-SM-5S2UA	Brain	3.34105
GTEX-ZDYS-0002-SM-4WKGR	Blood	7.72107
GTEX-OXRK-0126-SM-3NB1E	Adrenal Gland	14.6609
GTEX-11ZUS-0006-SM-5O9AJ	Blood	0.921017
GTEX-UJHI-0726-SM-3DB92	Lung	45.6708
GTEX-13S7M-1726-SM-5RQK3	Uterus	196.665
K-562-SM-4OOR8	Bone Marrow	0.291002
GTEX-QEL4-1026-SM-4R1JK	Blood Vessel	86.2887
GTEX-WEY5-2126-SM-3GILK	Blood Vessel	8.64101
GTEX-TSE9-0626-SM-3DB8B	Thyroid	96.6702
GTEX-YJ8O-1026-SM-5CVM5	Ovary	139.372
GTEX-139YR-2226-SM-5IFFW	Small Intestine	57.4725
GTEX-13CZV-0011-R5a-SM-5K7XA	Brain	3.83094
GTEX-UJHI-1026-SM-4IHJP	Stomach	114.722
GTEX-ZAB4-1826-SM-5HL8O	Nerve	67.9405
GTEX-1399S-0926-SM-5PNVQ	Blood Vessel	121.929
GTEX-Y9LG-0926-SM-4VDS6	Esophagus	75.909
GTEX-ZZPU-2226-SM-5EGIV	Vagina	17.7211
GTEX-139T6-0826-SM-5J1O2	Esophagus	48.7524
GTEX-13FTX-0726-SM-5N9BI	Stomach	6.11096
GTEX-ZF2S-0326-SM-4WKGD	Spleen	253.054
GTEX-ZQUD-0626-SM-51MR2	Esophagus	31.7415
GTEX-WQUQ-0426-SM-3MJFU	Skin	53.0728
GTEX-139T8-0526-SM-5KLZL	Muscle	29.9607
GTEX-QV31-0326-SM-447BM	Blood Vessel	121.028
GTEX-X4EP-0526-SM-3P5YW	Lung	51.711
GTEX-T2YK-0008-SM-4DM6M	Skin	58.0812
GTEX-131YS-1626-SM-5HL6C	Liver	80.1483
GTEX-144GM-1926-SM-5LUAN	Adipose Tissue	191.434
GTEX-OIZG-0526-SM-2HMLF	Lung	67.4011
GTEX-131YS-0011-R1a-SM-5DUXC	Brain	8.12124
GTEX-ZE9C-0011-R3a-SM-4WKGT	Brain	5.08096
GTEX-XQ8I-2126-SM-4BOOM	Colon	21.4916
GTEX-ZF3C-0226-SM-4WWB3	Adipose Tissue	261.107
GTEX-ZUA1-0826-SM-4YCDL	Heart	40.7012
GTEX-U3ZH-0326-SM-51MS7	Heart	39.93
GTEX-13SLX-0011-R4a-SM-5O9BJ	Brain	3.68101
GTEX-RVPV-1726-SM-2TF5W	Lung	53.9818
GTEX-XV7Q-2326-SM-4BRVZ	Breast	410.945
GTEX-YEC4-0126-SM-4W21T	Spleen	145.755
GTEX-P78B-0726-SM-2S1O2	Blood Vessel	78.6023
GTEX-QEL4-0008-SM-447AZ	Skin	765.469
GTEX-Q2AI-0926-SM-48U1F	Colon	14.3711
GTEX-WYVS-2426-SM-3NMA9	Nerve	247.383
GTEX-13PL7-2526-SM-5IFGR	Colon	14.7414
GTEX-ZLWG-0626-SM-4WWFR	Lung	46.4594
GTEX-ZF2S-0626-SM-4WKH2	Lung	73.1913
GTEX-12WSL-0005-SM-5NQAD	Blood	0.141003
GTEX-O5YV-1826-SM-2YUNI	Nerve	76.3311
GTEX-13FH7-1926-SM-5J2OL	Adipose Tissue	90.184
GTEX-1497J-0226-SM-5QGPU	Skin	195.104
GTEX-147F4-0006-SM-5O99T	Blood	0.190994
GTEX-11ZVC-0526-SM-5N9G1	Heart	95.9626
GTEX-131XG-0926-SM-5LZW5	Esophagus	61.1805
GTEX-12ZZY-0226-SM-5LZVE	Skin	96.9319
GTEX-QV44-1226-SM-4R1KE	Stomach	10.6908
GTEX-14753-0011-R10b-SM-5S2WE	Brain	1.74098
GTEX-ZLFU-1726-SM-4WWBU	Prostate	61.0703
GTEX-13JVG-0226-SM-5J1MW	Adipose Tissue	240.434
GTEX-N7MS-0011-R8a-SM-2YUMK	Brain	15.5711
GTEX-13U4I-0926-SM-5LU5A	Blood Vessel	70.2731
GTEX-1399S-0226-SM-5IFFG	Spleen	167.788
GTEX-139D8-0726-SM-5P9GJ	Muscle	25.4607
GTEX-13N11-0126-SM-5KM2Z	Spleen	116.453
GTEX-SIU7-1626-SM-4BRUK	Breast	143.858
GTEX-XOT4-0008-SM-4B664	Skin	132.413
GTEX-12WSA-1426-SM-5EGJU	Esophagus	34.612
GTEX-PW2O-1926-SM-2S1OB	Blood Vessel	96.8044
GTEX-144GN-0826-SM-5LU5G	Pancreas	79.9707
GTEX-QCQG-0126-SM-48U27	Adrenal Gland	34.7201
GTEX-Y5V5-1326-SM-4V6G9	Adrenal Gland	10.9807
GTEX-ZYY3-1226-SM-5EQKM	Blood Vessel	138.448
GTEX-WFG7-1526-SM-4LVMG	Colon	20.6504
GTEX-ZAJG-1626-SM-5HL7I	Adipose Tissue	482.237
GTEX-ZV6S-2126-SM-4YCEM	Muscle	11.9912
GTEX-13O3O-0011-R7b-SM-5P9GZ	Brain	2.91097
GTEX-13QBU-1926-SM-5IJEW	Small Intestine	123.161
GTEX-13SLW-2826-SM-5Q5ES	Colon	436.398
GTEX-WHPG-1526-SM-4M1ZK	Adrenal Gland	86.5103
GTEX-PVOW-1026-SM-5NQ7M	Lung	59.8094
GTEX-ZAJG-3026-SM-5HL92	Brain	3.80106
GTEX-QDVJ-0826-SM-48U1S	Esophagus	45.4025
GTEX-QEL4-0526-SM-3GIJ4	Blood Vessel	46.2795
GTEX-12WS9-0011-R10a-SM-57WBV	Brain	1.75103
GTEX-T5JC-2426-SM-3NMDB	Brain	4.61106
GTEX-ZVT3-0126-SM-5GU6I	Skin	288.835
K-562-SM-5IJB7	Bone Marrow	0.271007
GTEX-11EQ8-0006-SM-5P9HJ	Blood	0.0410009
GTEX-R55E-0006-SM-2TC5G	Blood	1.92106
GTEX-145LS-0011-R8b-SM-5PNXA	Brain	19.9111
GTEX-Y114-2126-SM-4TT8B	Skin	15.661
GTEX-ZVTK-0226-SM-51MRG	Skin	227.008
GTEX-PX3G-1526-SM-48U11	Stomach	8.15113
GTEX-ZPU1-1226-SM-5HL71	Adipose Tissue	325.632
GTEX-131YS-3026-SM-5EGHY	Brain	2.62097
K-562-SM-5K7ZB	Bone Marrow	0.271007
GTEX-QXCU-0006-SM-2TC5K	Blood	0.830988
GTEX-117YX-0626-SM-5EGJI	Heart	56.0328
GTEX-13PVQ-0011-R7a-SM-5L3G3	Brain	4.03089
GTEX-11XUK-0626-SM-5N9ES	Pancreas	15.6512
GTEX-W5WG-0006-SM-3GIJT	Blood	0.32099
GTEX-11ZU8-2626-SM-5EQLL	Nerve	68.0914
GTEX-ZPU1-0526-SM-4YCDA	Blood Vessel	335.437
GTEX-131XG-2526-SM-5HL7F	Nerve	74.6412
GTEX-1399R-1126-SM-5IFIO	Stomach	12.1813
GTEX-13OW6-0011-R1a-SM-5L3HQ	Brain	4.90108
GTEX-1497J-0126-SM-5Q5BK	Thyroid	106.344
GTEX-131XF-1226-SM-5HL8V	Stomach	8.25118
GTEX-12ZZY-2926-SM-5DUXO	Brain	3.22098
GTEX-TSE9-0005-SM-4DXUF	Blood	0.410997
GTEX-11P81-1126-SM-5GU5G	Colon	200.979
GTEX-YJ8O-1826-SM-5HL82	Lung	79.7935
GTEX-WY7C-2626-SM-3NB2P	Nerve	143.968
GTEX-14DAQ-1426-SM-5RQJD	Esophagus	82.7335
GTEX-WYJK-1626-SM-3NM9J	Thyroid	108.098
GTEX-145ME-1926-SM-5SI9S	Adipose Tissue	75.1499
GTEX-ZDXO-0011-R10a-SM-4WWD8	Brain	4.71089
GTEX-11GSP-1326-SM-5A5KY	Heart	45.8421
GTEX-13OW7-0011-R1b-SM-5L3HF	Brain	10.7413
GTEX-SIU8-0926-SM-2XCDO	Lung	67.4104
GTEX-XV7Q-1326-SM-4BRWM	Stomach	24.5015
GTEX-11DXY-1326-SM-5987Z	Esophagus	412
GTEX-11DXX-0226-SM-5P9HL	Thyroid	70.6393
GTEX-13X6J-3026-SM-5Q5CU	Brain	7.42093
GTEX-XAJ8-0526-SM-47JYK	Small Intestine	55.9009
GTEX-Y9LG-0008-SM-4VBRJ	Skin	252.038
GTEX-13FLV-1126-SM-5J2NO	Esophagus	49.1902
GTEX-147JS-2626-SM-5S2UX	Colon	351.407
GTEX-ZV7C-0326-SM-57WB1	Heart	24.5406
GTEX-1269C-2526-SM-5EGJ3	Skin	129.562
GTEX-12ZZZ-1326-SM-59HKW	Liver	37.2921
GTEX-12WSC-0005-SM-5MR3H	Blood	0.171004
GTEX-12WSM-0008-SM-5S2VD	Skin	360.236
GTEX-ZEX8-2426-SM-4WKG4	Skin	193.73
GTEX-WYJK-1326-SM-3NB2T	Breast	163.892
GTEX-11GS4-1026-SM-5N9DE	Adipose Tissue	305.325
GTEX-WEY5-0008-SM-4LMKC	Skin	174.49
GTEX-14E7W-1226-SM-5RQIU	Heart	55.4225
GTEX-13S86-0326-SM-5SI6K	Heart	139.643
GTEX-O5YW-0006-SM-3LK6E	Blood	0.160996
GTEX-11H98-0011-R8a-SM-5NQ8V	Brain	5.20104
GTEX-OHPJ-1326-SM-3MJHG	Esophagus	31.7812
GTEX-XBEC-1326-SM-4AT69	Heart	20.8215
GTEX-R3RS-1326-SM-48FE7	Esophagus	28.7004
GTEX-WHWD-0926-SM-4OORY	Esophagus	46.611
GTEX-12WSK-2226-SM-5GCO5	Breast	229.715
GTEX-ZDXO-0011-R1a-SM-4WKF4	Brain	6.29105
GTEX-111CU-1826-SM-5GZYN	Adipose Tissue	204.166
GTEX-11EMC-0926-SM-59863	Blood Vessel	180.431
GTEX-11ZVC-2926-SM-5986H	Blood Vessel	133.343
GTEX-T5JC-0011-R1A-SM-32PM6	Brain	12.8011
GTEX-YB5E-0526-SM-4VDSD	Pancreas	34.981
GTEX-OXRK-1626-SM-3NB17	Stomach	12.1207
GTEX-RU72-0326-SM-2TF5T	Heart	74.141
GTEX-Q2AH-0926-SM-48TZK	Pancreas	44.3696
GTEX-13QJC-0011-R8b-SM-5S2U6	Brain	4.62098
GTEX-ZV68-0011-R10a-SM-51MT7	Brain	3.69097
GTEX-147F4-0011-R8b-SM-5S2UN	Brain	4.78096
GTEX-Y8E4-1326-SM-5IFIY	Pancreas	75.1812
GTEX-13OW6-1826-SM-5N9F9	Kidney	11.241
GTEX-1128S-2826-SM-5N9DI	Brain	2.71095
GTEX-111FC-3326-SM-5GZYV	Brain	8.371
GTEX-139UC-0005-SM-5PNU7	Blood	1.96101
GTEX-139UC-3126-SM-5J1OY	Brain	7.43122
GTEX-RVPU-2326-SM-2TF6R	Adipose Tissue	357.03
GTEX-VUSG-0326-SM-3GIJ7	Pancreas	128.338
GTEX-12WSH-3026-SM-5CVNI	Brain	3.63108
GTEX-11P82-1726-SM-5Q5AT	Adipose Tissue	103.76
GTEX-12584-0005-SM-5N9GM	Blood	1.02101
GTEX-T6MN-1126-SM-4DM71	Blood Vessel	231.297
GTEX-X15G-2126-SM-4PQZR	Salivary Gland	224.754
GTEX-RU72-2226-SM-46MUE	Ovary	25.0702
GTEX-Y8LW-0002-SM-4V6G2	Blood	0.431012
GTEX-ZAB4-1426-SM-5CVN6	Adipose Tissue	478.807
GTEX-X4EO-0126-SM-3P5YN	Nerve	158.881
GTEX-13X6J-0011-R7b-SM-5PNUC	Brain	9.03109
GTEX-11P81-2726-SM-59876	Blood Vessel	113.292
GTEX-14BIM-0326-SM-5SI9B	Muscle	22.6306
GTEX-131XF-1026-SM-5BC6A	Lung	23.9508
GTEX-11EM3-1026-SM-5A5KL	Stomach	5.79095
GTEX-P4PQ-1526-SM-3NMCK	Stomach	61.2696
GTEX-TSE9-1226-SM-4DXTM	Esophagus	24.7902
GTEX-Z9EW-0526-SM-5HL8S	Esophagus	14.441
GTEX-X3Y1-0008-SM-4PR12	Skin	671.433
GTEX-OOBJ-1526-SM-3NB1Q	Stomach	13.9907
GTEX-OXRP-0126-SM-48TDI	Skin	303.531
GTEX-111VG-1926-SM-5GIDO	Testis	5.10107
GTEX-13O3Q-0326-SM-5L3FE	Heart	100.142
GTEX-ZXG5-0926-SM-5NQ8H	Thyroid	141.818
GTEX-12696-3026-SM-5FQTU	Brain	4.58112
GTEX-RWS6-1726-SM-47JXP	Vagina	229.238
GTEX-PWO3-1526-SM-48TCM	Skin	82.5502
K-562-SM-5O9BA	Bone Marrow	0.0710018
GTEX-13S86-0005-SM-5NQ7I	Blood	0.150998
GTEX-POYW-0526-SM-5KM2H	Muscle	31.3219
GTEX-ZQG8-1526-SM-5HL65	Adipose Tissue	104.771
GTEX-ZC5H-0526-SM-5HL9E	Nerve	246.407
GTEX-ZDXO-0011-R5a-SM-4WKG5	Brain	13.871
GTEX-145LU-0011-R11b-SM-5P9JX	Brain	2.00097
GTEX-13RTJ-0011-R8b-SM-5O9DL	Brain	3.23104
GTEX-WQUQ-0006-SM-3MJF4	Blood	1.08103
GTEX-X638-0126-SM-47JZ8	Skin	331.485
GTEX-ZVT3-0011-R11b-SM-57WBI	Brain	2.63098
GTEX-ZT9X-0526-SM-5GCOP	Esophagus	26.7413
GTEX-QLQW-1426-SM-2S1QU	Nerve	172.805
GTEX-X4EP-0726-SM-3P5YJ	Nerve	113.669
GTEX-139T4-0008-SM-5S2WF	Skin	25.9201
GTEX-ZA64-1426-SM-5CVMC	Colon	50.3493
GTEX-11P81-0326-SM-5HL6B	Blood Vessel	92.8803
GTEX-NL3H-0011-R1a-SM-48TDJ	Brain	4.19102
GTEX-X4EP-0011-R5A-SM-3P628	Brain	41.831
GTEX-ZVT3-2126-SM-59HL2	Stomach	58.0893
GTEX-P78B-1626-SM-5SI85	Muscle	11.041
GTEX-11NUK-1226-SM-5P9GM	Liver	37.4009
GTEX-11VI4-0006-SM-5N9D8	Blood	0.0909993
GTEX-147GR-0011-R4a-SM-5S2V2	Brain	10.5912
GTEX-T8EM-0826-SM-4DM76	Pancreas	30.4401
GTEX-T5JC-0011-R11A-SM-32PMB	Brain	1.471
GTEX-12C56-1226-SM-5FQSU	Esophagus	8.23118
GTEX-ZDXO-3126-SM-5IJDF	Skin	220.037
GTEX-U412-0526-SM-3DB9I	Adipose Tissue	218.668
GTEX-139UC-2926-SM-5J1N6	Muscle	28.9702
GTEX-S4UY-1326-SM-4AD4X	Vagina	33.4608
GTEX-131YS-0426-SM-5EQ4J	Blood Vessel	290.24
GTEX-11TT1-0004-SM-5S2NT	Blood	0.721014
GTEX-14BMU-1826-SM-5RQII	Uterus	313.843
GTEX-XBEW-0626-SM-4QASP	Skin	29.9711
GTEX-111VG-0326-SM-5GZX7	Heart	62.531
GTEX-X5EB-0008-SM-46MU3	Skin	293.476
GTEX-XV7Q-2926-SM-4BRUL	Muscle	95.0293
GTEX-11GS4-3026-SM-5A5LG	Pituitary	16.691
GTEX-ZF3C-2026-SM-4WWB5	Pancreas	125.792
GTEX-12ZZY-0011-R10b-SM-5HL7W	Brain	6.05111
GTEX-13OW7-2926-SM-5MR3Z	Brain	3.17092
GTEX-11WQC-2626-SM-5CVLF	Muscle	62.709
GTEX-WHPG-1426-SM-3NMBB	Lung	72.1987
GTEX-T6MO-0126-SM-4DM6X	Adrenal Gland	21.2604
GTEX-XBEC-0526-SM-4QARU	Blood Vessel	90.7924
GTEX-ZAB4-2926-SM-57WCV	Brain	4.00111
GTEX-13NYS-0011-R5a-SM-5MR4D	Brain	4.83093
GTEX-14DAQ-1826-SM-5S2VV	Adrenal Gland	145.502
GTEX-ZVT4-0008-SM-57WCA	Skin	229.079
GTEX-T6MO-1426-SM-4DM73	Cervix Uteri	105.019
GTEX-146FQ-1226-SM-5QGQ4	Esophagus	32.8017
GTEX-TKQ2-0004-SM-3NMAC	Blood	0.460988
GTEX-13NZB-0626-SM-5IFH6	Liver	61.0407
GTEX-12WSH-0005-SM-5NQ9P	Blood	1.32097
GTEX-13O21-2926-SM-5J1OU	Blood Vessel	188.824
GTEX-X5EB-2026-SM-4E3KA	Testis	4.31093
GTEX-11P7K-0426-SM-5BC5H	Spleen	193.582
GTEX-11EM3-1326-SM-5N9C6	Breast	208.659
GTEX-YJ8O-2526-SM-5HL85	Skin	199.687
GTEX-OHPN-0011-R9A-SM-2YUMN	Brain	15.2412
GTEX-ZTSS-0726-SM-51MSN	Esophagus	45.9311
GTEX-11UD1-0011-R3a-SM-5BC6S	Brain	3.65102
GTEX-XUZC-0926-SM-4BOQF	Uterus	97.3022
GTEX-Y9LG-0226-SM-4VBS4	Blood Vessel	249.951
GTEX-ZF2S-0426-SM-4WKGP	Pancreas	48.0912
GTEX-X585-1426-SM-4E3JO	Esophagus	191.367
GTEX-X4EP-0011-R11B-SM-4QASK	Brain	1.02101
GTEX-11DXX-0526-SM-5PNVR	Heart	52.8122
GTEX-13NZ8-2126-SM-5L3EO	Muscle	25.5402
GTEX-RU72-2926-SM-2TF66	Brain	10.5509
GTEX-RM2N-1726-SM-2TF55	Adipose Tissue	106.913
GTEX-ZTSS-1026-SM-5985N	Adipose Tissue	74.973
GTEX-11VI4-1126-SM-5EQMD	Skin	59.1211
GTEX-12WSJ-0126-SM-5GCOM	Adrenal Gland	109.554
GTEX-11TT1-1126-SM-5P9GV	Thyroid	48.641
GTEX-12WSD-0926-SM-5GCNL	Thyroid	169.178
GTEX-RUSQ-2126-SM-47JXK	Testis	11.8212
GTEX-145MF-2726-SM-5O995	Brain	5.50102
GTEX-XXEK-0005-SM-4BRWJ	Blood	0.171004
GTEX-YECK-2826-SM-5IFHF	Colon	255.344
GTEX-QDVJ-0726-SM-48U1W	Esophagus	9.65114
K-562-SM-5K7TT	Bone Marrow	0.280992
GTEX-OOBK-0126-SM-2YUND	Skin	130.03
GTEX-ZEX8-0826-SM-4WKHK	Liver	50.1716
GTEX-13FH7-1226-SM-5IJFK	Small Intestine	50.0605
GTEX-147JS-2526-SM-5S2Q8	Colon	319.041
GTEX-NPJ8-2226-SM-3TW8D	Kidney	10.7413
GTEX-SUCS-0926-SM-4DM4Z	Stomach	6.09109
GTEX-UPK5-0326-SM-3GAF3	Heart	58.0691
GTEX-ZP4G-1326-SM-5EGIW	Adipose Tissue	108.918
GTEX-OXRL-0326-SM-2I3F2	Heart	28.3505
GTEX-XMK1-2426-SM-4B66I	Nerve	180.243
GTEX-ZYFC-0426-SM-5GICQ	Skin	118.743
GTEX-XV7Q-0126-SM-4BRVK	Spleen	195.226
GTEX-XBED-2226-SM-47JYQ	Skin	104.474
GTEX-14A6H-2626-SM-5NQBO	Nerve	185.58
GTEX-12WSK-2126-SM-5CVNC	Skin	41.9413
GTEX-YF7O-1326-SM-4W1ZR	Pancreas	47.2617
GTEX-13FXS-3026-SM-5LZYO	Brain	3.97099
GTEX-12WSL-2326-SM-5DUXQ	Testis	4.65087
GTEX-11OC5-0526-SM-5N9EE	Nerve	138.227
GTEX-PLZ5-1626-SM-3NB21	Nerve	90.6289
GTEX-13RTK-0326-SM-5RQHS	Thyroid	36.6617
GTEX-13OW6-0826-SM-5L3GA	Lung	32.5706
GTEX-YJ8O-2726-SM-5IFJ7	Blood Vessel	268.337
GTEX-13X6H-0526-SM-5LU4Q	Thyroid	65.9088
GTEX-11EQ9-1426-SM-5987G	Colon	93.4097
GTEX-Z93S-2626-SM-57WBX	Colon	211.132
GTEX-11XUK-2226-SM-5CVLL	Muscle	11.3711
GTEX-ZVT4-1026-SM-57WC4	Breast	474.38
GTEX-XYKS-0926-SM-4BRVG	Adrenal Gland	19.3908
GTEX-14BIM-3226-SM-5RQIQ	Pituitary	17.9113
GTEX-ZYFG-0126-SM-5GIDH	Blood Vessel	123.571
GTEX-111CU-1726-SM-5EGHM	Testis	5.83082
GTEX-132QS-0126-SM-5IFH9	Adrenal Gland	43.5017
GTEX-145LT-0326-SM-5LUAD	Lung	19.9207
GTEX-X15G-1326-SM-4PQZJ	Colon	30.5309
GTEX-144GM-0826-SM-5O98R	Prostate	12.2109
GTEX-12WSK-0826-SM-5CVNP	Lung	33.2619
GTEX-13NZ9-0726-SM-5J1ME	Nerve	195.361
GTEX-11ZUS-1826-SM-5FQTR	Adipose Tissue	255.468
GTEX-13QIC-1826-SM-5J1MY	Vagina	479.371
GTEX-11WQC-2526-SM-5CVLE	Skin	193.327
GTEX-WXYG-1226-SM-4ONCJ	Esophagus	7.41116
GTEX-WY7C-1326-SM-4ONCX	Esophagus	74.4036
GTEX-13SLX-0011-R10a-SM-5P9HV	Brain	3.34105
GTEX-1399R-2326-SM-5PNYT	Blood Vessel	104.822
GTEX-ZAB4-2226-SM-5HL97	Colon	189.927
GTEX-WYVS-1526-SM-4OND4	Ovary	133.038
GTEX-V1D1-1726-SM-4JBHB	Stomach	14.3512
GTEX-SE5C-1026-SM-4BRUG	Bladder	22.9004
GTEX-12696-1226-SM-5FQSM	Heart	65.7902
GTEX-14C38-0726-SM-5SI6M	Skin	18.1916
GTEX-117XS-0526-SM-5987Q	Thyroid	173.585
GTEX-13PVR-1426-SM-5S2PW	Vagina	226.019
GTEX-XUW1-1826-SM-4BOQD	Colon	33.8809
GTEX-XYKS-2526-SM-4BOPX	Nerve	89.9717
GTEX-ZVE1-0726-SM-51MRN	Skin	34.5904
GTEX-YEC3-1726-SM-5IFIK	Testis	3.79106
GTEX-12WSG-0005-SM-5NQA2	Blood	0.141003
GTEX-RU72-0011-R6A-SM-2TF71	Brain	4.13103
GTEX-Y8LW-0126-SM-4VBS1	Spleen	147.125
GTEX-QDVN-0526-SM-48TZ4	Spleen	193.166
GTEX-ZVZP-2526-SM-57WBR	Muscle	7.78124
GTEX-14C39-1726-SM-5RQIL	Skin	6.55093
GTEX-RU72-0626-SM-46MUI	Breast	227.386
GTEX-146FR-0126-SM-5Q5F3	Pancreas	46.2602
GTEX-11DZ1-0426-SM-5H11A	Lung	132.065
GTEX-ZE9C-0011-R5a-SM-5EGLO	Brain	7.34112
GTEX-XUW1-1526-SM-4BOOY	Esophagus	30.7412
GTEX-145ME-1126-SM-5SIAT	Colon	114.873
GTEX-PLZ4-0226-SM-5SI7M	Adipose Tissue	419.463
GTEX-12WSH-1526-SM-5BC5W	Skin	98.3327
GTEX-ZYT6-0526-SM-5GIEA	Lung	57.4924
GTEX-1314G-2026-SM-5LZUM	Salivary Gland	133.057
GTEX-WHSE-0626-SM-4RGNF	Thyroid	39.3121
GTEX-13FXS-0226-SM-5IJCK	Skin	51.6108
GTEX-Z93S-0011-R10a-SM-4RGNM	Brain	4.65087
GTEX-13X6J-0011-R8b-SM-5PNUA	Brain	8.28097
GTEX-ZVZP-0226-SM-5NQ73	Heart	23.2813
GTEX-ZVE2-0426-SM-59HJ7	Nerve	228.936
GTEX-12ZZX-0011-R10b-SM-5DUWK	Brain	6.8709
GTEX-117YX-1926-SM-5GIEC	Skin	56.3092
GTEX-WH7G-1726-SM-4LVKY	Prostate	19.1106
GTEX-ZF3C-0326-SM-4WWBF	Muscle	12.3514
GTEX-139TS-0126-SM-5K7XJ	Thyroid	255.894
GTEX-13D11-2126-SM-5IFH2	Stomach	6.50117
GTEX-Q2AG-0326-SM-48U1O	Breast	351.626
GTEX-12696-0626-SM-5EGGD	Adrenal Gland	76.2096
GTEX-QESD-0008-SM-447B2	Skin	337.116
GTEX-13RTJ-0626-SM-5S2NB	Blood Vessel	87.992
GTEX-S33H-2226-SM-5S2UF	Muscle	52.9112
GTEX-12584-2126-SM-5FQUM	Adipose Tissue	174.2
GTEX-XQ8I-2426-SM-4WAXY	Breast	63.4523
GTEX-11TT1-1726-SM-5EQLJ	Liver	34.7105
GTEX-11NSD-1826-SM-5N9CF	Nerve	78.9901
GTEX-13X6I-0011-R1b-SM-5PNZC	Brain	3.15098
GTEX-N7MT-1626-SM-3LK71	Pancreas	52.1104
GTEX-WYVS-1926-SM-4PQZ2	Liver	169.53
GTEX-WHSE-0011-R4A-SM-3P5ZN	Brain	22.4805
K-562-SM-2S1RI	Bone Marrow	0.260996
GTEX-12WSK-1326-SM-5CVNM	Esophagus	60.5729
GTEX-13NZA-1426-SM-5KM4Y	Lung	31.9114
GTEX-OIZH-0005-SM-2HMJN	Blood	0.0810019
GTEX-11XUK-1426-SM-5EQMG	Small Intestine	40.1103
GTEX-WWYW-3126-SM-3NB39	Brain	3.28092
GTEX-QLQ7-1526-SM-2S1QA	Adipose Tissue	262.359
GTEX-13CIG-0011-R9a-SM-5K7VU	Brain	16.8807
GTEX-WOFL-0826-SM-3MJG1	Breast	193.448
GTEX-13FTW-1326-SM-5LZZD	Testis	6.03101
GTEX-OXRP-0126-SM-3NB32	Skin	307.448
GTEX-13NZ9-1026-SM-5MR5K	Breast	450.755
GTEX-ZGAY-0926-SM-4WWBQ	Blood Vessel	19.321
GTEX-Y8DK-0004-SM-4RGM7	Blood	2.15099
GTEX-12ZZW-2326-SM-5DUW2	Adipose Tissue	357.971
GTEX-OHPJ-0006-SM-3LK6G	Blood	4.77103
GTEX-13PL6-0011-R9b-SM-5O9CH	Brain	9.42113
GTEX-XOTO-0326-SM-4B66K	Nerve	220.204
GTEX-13JVG-0726-SM-5KM16	Skin	27.8113
GTEX-WYVS-1126-SM-4SOJX	Colon	152.821
K-562-SM-2S1Q5	Bone Marrow	1.12101
GTEX-131XW-0726-SM-5EGK3	Breast	379.459
GTEX-WFON-1426-SM-4LVMT	Colon	14.6812
GTEX-146FH-1226-SM-5NQB6	Lung	103.501
GTEX-U3ZN-0926-SM-4DXTU	Vagina	195.944
GTEX-11LCK-0926-SM-5A5KA	Heart	13.5414
GTEX-13O21-2426-SM-5MR4A	Colon	3.85091
GTEX-YB5K-1826-SM-5IFJC	Pancreas	10.6908
GTEX-13OW7-0426-SM-5K7VK	Skin	114.183
GTEX-14A5I-2426-SM-5Q5CP	Colon	116.558
GTEX-RWSA-2426-SM-47JXR	Testis	6.74117
GTEX-ZY6K-0626-SM-59HJL	Esophagus	12.0011
GTEX-146FQ-1726-SM-5QGPX	Prostate	39.5115
GTEX-12126-1026-SM-5P9JJ	Brain	9.3308
GTEX-XMK1-0001-SM-4B64F	Blood	0.870973
GTEX-13X6I-0011-R11a-SM-5P9HN	Brain	0.830988
GTEX-WVLH-0011-R5A-SM-3MJFW	Brain	11.6108
GTEX-YFC4-1426-SM-5IFJG	Breast	317.938
GTEX-WHPG-2226-SM-3NMBO	Muscle	28.5912
GTEX-13OVH-1826-SM-5K7YW	Esophagus	80.1705
GTEX-113IC-0226-SM-5HL5C	Adipose Tissue	822.687
GTEX-11TUW-0226-SM-5LU8X	Thyroid	43.0518
GTEX-13OVI-1226-SM-5J2ME	Adrenal Gland	24.9817
GTEX-145ME-1226-SM-5SIB6	Ovary	25.6005
GTEX-ZAJG-0526-SM-5S2MT	Muscle	16.8514
GTEX-12696-3126-SM-5FQUX	Pituitary	9.13117
GTEX-ZP4G-0926-SM-4WWF4	Esophagus	47.4718
GTEX-111YS-2126-SM-5EGGM	Nerve	53.0912
GTEX-11UD2-2826-SM-5GU6X	Testis	17.731
GTEX-V955-2026-SM-3GAFA	Breast	46.3726
GTEX-146FQ-0526-SM-5LU9I	Blood Vessel	310.877
GTEX-131XG-1426-SM-5GCMO	Pancreas	41.2322
GTEX-13OVG-0226-SM-5LU93	Thyroid	130.527
GTEX-XAJ8-0008-SM-46MU7	Skin	221.015
GTEX-ZYFD-2526-SM-5E45L	Prostate	14.2907
GTEX-13O3O-1526-SM-5KM1C	Heart	11.331
GTEX-13PVQ-1926-SM-5L3GN	Esophagus	133.002
GTEX-111FC-0826-SM-5GZWO	Heart	75.4422
GTEX-11EM3-1826-SM-5A5KO	Vagina	178.23
GTEX-14AS3-1626-SM-5S2OY	Breast	234.59
GTEX-UPK5-2126-SM-4JBJK	Stomach	314.976
GTEX-14BIN-0926-SM-5S2OZ	Blood Vessel	43.2701
GTEX-12KS4-2126-SM-5FQUT	Skin	74.8225
GTEX-RUSQ-1826-SM-2TF6E	Nerve	59.8094
GTEX-11NUK-1726-SM-5A5L2	Esophagus	164.233
GTEX-Y3I4-0826-SM-4TT2A	Pancreas	23.3508
GTEX-145ME-0826-SM-5O9AF	Colon	167.649
GTEX-117YX-0326-SM-5GICL	Small Intestine	141.897
GTEX-13NYB-1826-SM-5J1N3	Small Intestine	338.403
GTEX-14AS3-0426-SM-5QGQK	Adipose Tissue	164.04
GTEX-R55C-1926-SM-2TF4K	Nerve	66.101
GTEX-VUSG-2226-SM-4KKZO	Breast	289.938
GTEX-12WSB-0011-R1b-SM-5P9EY	Brain	3.37105
GTEX-WOFL-0726-SM-3MJG4	Thyroid	212.615
GTEX-13NZA-0826-SM-5K7WS	Heart	97.1202
GTEX-YJ89-0126-SM-4TT3X	Skin	23.6407
GTEX-11DXX-2426-SM-5GZZW	Skin	77.1503
GTEX-11OC5-0426-SM-5Q5AR	Blood Vessel	39.7808
GTEX-13FTW-0326-SM-5K7UW	Skin	72.6908
GTEX-11P81-1626-SM-5BC52	Uterus	178.862
GTEX-WRHK-0426-SM-4MVOG	Esophagus	45.1202
GTEX-Q734-0626-SM-2I3EF	Lung	122.429
GTEX-RVPV-0526-SM-47JYL	Esophagus	56.0794
GTEX-12WS9-0011-R4b-SM-5P9EU	Brain	1.63105
GTEX-13O1R-2326-SM-5IJF9	Adrenal Gland	19.9512
GTEX-12126-0011-R9b-SM-5BC6P	Brain	25.5916
GTEX-13X6H-0626-SM-5LU53	Pancreas	37.4917
GTEX-148VJ-0011-R9b-SM-5SI77	Brain	2.87109
GTEX-XUW1-1026-SM-4BONY	Thyroid	42.0811
GTEX-12ZZX-1926-SM-5EGKC	Vagina	501.185
GTEX-131YS-2926-SM-5EGKI	Colon	245.606
GTEX-13VXT-1426-SM-5LU4B	Lung	18.1815
GTEX-X4XY-0826-SM-4E3JM	Thyroid	71.7099
GTEX-11TT1-0005-SM-5NQ8Y	Blood	0.150998
GTEX-139YR-2426-SM-5J1OB	Adipose Tissue	158.969
GTEX-13OVL-1326-SM-5IJCZ	Blood Vessel	150.602
GTEX-131XE-2726-SM-5P9G7	Muscle	19.8615
GTEX-11P81-2226-SM-5PNYI	Skin	84.1388
GTEX-WH7G-0002-SM-4LVN9	Blood	0.160996
K-562-SM-4WAWH	Bone Marrow	0.291002
GTEX-13112-2126-SM-5GCO4	Kidney	104.264
GTEX-1314G-0826-SM-5BC6L	Esophagus	132.275
GTEX-131XH-2926-SM-5LZU4	Brain	1.59096
GTEX-WHPG-2126-SM-4M1ZM	Adipose Tissue	997.45
GTEX-ZC5H-0008-SM-4WAX8	Skin	83.3436
GTEX-Y5V6-0003-SM-4V6FX	Blood	0.210998
GTEX-X4EP-3226-SM-3P5YR	Pituitary	8.13082
GTEX-132AR-0326-SM-5KM2C	Skin	128.098
GTEX-OHPK-2526-SM-3MJH9	Vagina	66.2432
GTEX-ZVTK-0008-SM-57WDA	Skin	509.204
GTEX-131XH-0011-R1a-SM-5DUWA	Brain	11.7811
GTEX-145MI-0011-R10a-SM-5PNZD	Brain	3.83094
GTEX-14BMU-1326-SM-5RQIH	Colon	72.9532
GTEX-UPJH-0826-SM-4WKFD	Lung	33.6609
GTEX-POMQ-1226-SM-3P61F	Uterus	170.591
GTEX-12WSC-0826-SM-5EQ5Q	Thyroid	156.606
GTEX-X585-0011-R2B-SM-46MVF	Brain	12.5108
GTEX-Y8LW-0426-SM-4VBQ6	Blood Vessel	140.371
GTEX-14A5H-1626-SM-5SIAN	Colon	76.8834
GTEX-13X6J-3126-SM-5Q5EJ	Pituitary	95.0688
GTEX-ZDTT-2726-SM-4WKF8	Skin	49.632
GTEX-T5JW-1826-SM-3GAE1	Muscle	19.2315
GTEX-139TU-0726-SM-5L3EK	Skin	49.9496
GTEX-W5X1-0826-SM-3GILN	Heart	66.3397
GTEX-WRHK-0005-SM-3MJF5	Blood	0.141003
GTEX-Z93S-0011-R3b-SM-4RGNH	Brain	4.4611
GTEX-XYKS-0526-SM-4BRW2	Lung	14.5606
GTEX-XPVG-2526-SM-4B66D	Muscle	8.91108
GTEX-X4XX-0011-R10B-SM-46MWO	Brain	5.03084
GTEX-11EMC-3226-SM-5EGKW	Brain	5.56083
GTEX-X4XX-0011-R6B-SM-46MWP	Brain	7.79095
GTEX-Q2AH-0008-SM-48U2J	Skin	24.8212
GTEX-ZTTD-2826-SM-4YCFA	Skin	40.5098
GTEX-X4EO-1226-SM-4QARR	Esophagus	25.4801
GTEX-13FTW-2326-SM-5K7YS	Muscle	14.6213
GTEX-WI4N-0626-SM-3TW8Z	Heart	39.6899
GTEX-ZXES-0008-SM-57WCX	Skin	349.173
GTEX-11VI4-0726-SM-5GU5B	Vagina	105.551
GTEX-RU72-0011-R11A-SM-5SI8G	Brain	0.850982
GTEX-R55E-0526-SM-2TC6B	Muscle	35.8003
GTEX-11P7K-0626-SM-5985Z	Prostate	18.1815
GTEX-13OW8-1226-SM-5K7XD	Adipose Tissue	530.019
GTEX-RVPV-0006-SM-2TF6Q	Blood	0.300993
GTEX-POMQ-0626-SM-3P61E	Esophagus	107.612
GTEX-QDVN-1326-SM-48TZ3	Colon	65.7719
GTEX-ZYW4-0526-SM-5GZZ5	Muscle	23.8712
GTEX-OOBJ-0226-SM-2YUMM	Adipose Tissue	152.631
GTEX-NPJ8-0011-R3a-SM-2HMIW	Brain	11.7013
GTEX-11P7K-0826-SM-5BC5F	Adipose Tissue	387.728
GTEX-Y111-2026-SM-4SOJA	Breast	194.389
GTEX-R55F-0126-SM-48FCK	Skin	173.537
GTEX-13NZ8-1626-SM-5IJBC	Blood Vessel	114.064
GTEX-XBED-1026-SM-48TCB	Esophagus	14.9213
GTEX-14DAR-1426-SM-5RQIR	Small Intestine	16.7107
GTEX-13FLV-0126-SM-5K7WT	Skin	85.7937
GTEX-WRHU-2826-SM-3MJG8	Skin	115.408
GTEX-132QS-0226-SM-5IFFZ	Spleen	227.071
GTEX-RNOR-0011-R3A-SM-2TF5J	Brain	5.66117
GTEX-XUW1-0926-SM-4BONX	Skin	21.2207
GTEX-POMQ-2026-SM-2S1OD	Nerve	277.934
GTEX-ZTX8-1626-SM-51MRY	Muscle	11.8507
GTEX-T6MO-0526-SM-4DM6R	Esophagus	10.1113
GTEX-ZDTS-1326-SM-4WKGX	Heart	34.4421
GTEX-T5JC-0011-R6A-SM-5SI89	Brain	16.211
GTEX-Y5LM-0005-SM-4V6EJ	Blood	0.240999
GTEX-WHSB-0226-SM-4M1XE	Blood Vessel	164.655
GTEX-11EQ8-1326-SM-5EGJQ	Heart	98.4623
GTEX-12C56-0006-SM-5N9E9	Blood	0.0410009
GTEX-14AS3-1726-SM-5RQJV	Vagina	29.8612
GTEX-ZV68-0011-R5a-SM-4YCDW	Brain	4.12102
GTEX-11XUK-2026-SM-5EQLF	Skin	35.7805
GTEX-ZZ64-1326-SM-5E444	Blood Vessel	43.8316
GTEX-144GN-2326-SM-5LU4F	Skin	139.035
GTEX-145ME-0526-SM-5QGQV	Esophagus	24.4913
GTEX-Y5V6-0008-SM-4V6FV	Skin	120.367
GTEX-11EM3-0526-SM-5H12N	Blood Vessel	41.0412
GTEX-UPIC-0626-SM-4IHK2	Esophagus	55.2422
GTEX-X4EP-0326-SM-3P5Z6	Heart	51.55
GTEX-13O21-1826-SM-5MR5M	Nerve	96.4627
GTEX-ZDYS-2326-SM-4WKG6	Colon	17.0713
GTEX-11XUK-0126-SM-5CVLK	Adrenal Gland	18.5404
GTEX-ZT9W-0726-SM-4YCDC	Lung	16.2414
GTEX-ZV7C-0526-SM-51MRB	Heart	13.6706
GTEX-12696-1926-SM-5EGJT	Colon	70.7815
GTEX-12WSB-3026-SM-59HKM	Brain	2.01098
GTEX-13NYB-2926-SM-5K7VH	Blood Vessel	116.018
GTEX-14ABY-0011-R9a-SM-5PNZK	Brain	16.1908
GTEX-ZLWG-1226-SM-4WWFS	Esophagus	64.8799
GTEX-11UD1-0126-SM-5PNYG	Skin	59.5199
GTEX-YB5K-0426-SM-5LUA4	Blood Vessel	355.351
GTEX-12WSN-2526-SM-5LZU8	Muscle	23.0805
GTEX-R55G-0008-SM-48FEX	Skin	66.4824
GTEX-12WSK-0226-SM-5BC62	Pancreas	30.021
GTEX-13YAN-0526-SM-5O9BE	Muscle	89.872
GTEX-Q734-0526-SM-2I3EH	Thyroid	354.858
GTEX-RNOR-0526-SM-2TF4O	Muscle	29.3401
GTEX-ZQG8-2426-SM-57WEE	Colon	69.58
GTEX-12WSA-0011-R5b-SM-5GU5I	Brain	7.23102
GTEX-RWS6-0326-SM-2XCAP	Heart	18.3906
GTEX-WH7G-0526-SM-3NMBI	Thyroid	37.9703
GTEX-ZLV1-1426-SM-4WWES	Breast	159.311
GTEX-12696-1426-SM-5EGJ6	Esophagus	54.5308
GTEX-T2IS-0126-SM-4DM6O	Skin	115.672
GTEX-13O1R-2526-SM-5N9FW	Kidney	10.031
GTEX-OIZH-1426-SM-3NB1O	Colon	21.9614
GTEX-QESD-0226-SM-447BH	Pancreas	64.0888
GTEX-1399T-0011-R4b-SM-5DUVX	Brain	9.39114
GTEX-QV31-1426-SM-2S1QD	Muscle	14.7506
GTEX-ZVT4-0226-SM-51MSD	Adipose Tissue	584.557
GTEX-OOBK-2025-SM-3LK5S	Prostate	16.661
K-562-SM-5QGOR	Bone Marrow	0.0810019
GTEX-12WSM-0626-SM-5GCOK	Adipose Tissue	133.899
GTEX-ZE9C-0011-R7a-SM-4WWCX	Brain	8.35072
GTEX-ZP4G-2226-SM-57WFB	Nerve	124.621
GTEX-1477Z-1126-SM-5P9GK	Heart	81.7813
GTEX-13X6K-0011-R5b-SM-5PNUE	Brain	5.0711
GTEX-13X6K-3026-SM-5QGPA	Pituitary	23.2217
GTEX-TKQ1-0126-SM-33HB3	Thyroid	55.5995
GTEX-11EI6-0426-SM-5EQ43	Nerve	160.541
GTEX-13OW6-2926-SM-5KM29	Brain	2.18102
GTEX-131XE-0006-SM-5P9F9	Blood	0.0209995
GTEX-YF7O-0426-SM-5P9FS	Heart	46.4305
GTEX-Y9LG-2226-SM-4VDS9	Nerve	61.589
GTEX-OXRP-2426-SM-2S1NR	Blood Vessel	201.593
GTEX-11ZTT-1626-SM-5EQKR	Colon	52.7793
GTEX-13CF2-0011-R5a-SM-5LZWS	Brain	4.83093
GTEX-S4Q7-0006-SM-3K2AT	Blood	0.190994
GTEX-S3XE-1326-SM-4AD4H	Prostate	13.131
GTEX-N7MT-0726-SM-3TW8S	Uterus	155.083
GTEX-146FH-1126-SM-5NQAT	Heart	140.322
GTEX-12WSF-0011-R7b-SM-5HL99	Brain	6.27102
GTEX-11GSP-3126-SM-5A5LL	Brain	2.87109
GTEX-13RTJ-3126-SM-5S2Q4	Brain	0.821026
GTEX-13X6K-0011-R4b-SM-5P9HO	Brain	5.53085
GTEX-131YS-2426-SM-5J2OD	Vagina	514.098
GTEX-13OVJ-0011-R8b-SM-5L3FS	Brain	3.93101
GTEX-QLQ7-1926-SM-2S1R6	Blood Vessel	235.258
GTEX-12KS4-0005-SM-5SI94	Blood	3.07098
GTEX-Y9LG-1026-SM-5IFJN	Stomach	10.1908
GTEX-11P82-1326-SM-5HL62	Breast	30.88
GTEX-XOTO-3026-SM-4B65M	Brain	2.31097
GTEX-11TUW-2126-SM-5GU7B	Prostate	11.051
GTEX-OXRL-1626-SM-2YUMU	Muscle	12.8509
GTEX-R55F-0011-R6A-SM-2TF4L	Brain	2.77099
GTEX-11VI4-0426-SM-5EGHZ	Pancreas	37.2508
GTEX-REY6-0005-SM-2TF54	Blood	0.650987
GTEX-QV31-0526-SM-447C3	Esophagus	12.5212
GTEX-12WSL-0226-SM-5CVMJ	Liver	13.0511
GTEX-QDVN-2226-SM-2S1PM	Nerve	94.799
GTEX-WYVS-0006-SM-3NMA7	Blood	1.241
GTEX-11ZVC-0726-SM-5FQT9	Liver	68.271
GTEX-ZYVF-2726-SM-5GID4	Stomach	61.7814
GTEX-12WSL-1126-SM-5CVNK	Adipose Tissue	124.56
GTEX-PWN1-1526-SM-48TDA	Stomach	7.61107
GTEX-XQ3S-0426-SM-4BOOA	Muscle	20.8909
GTEX-13PVR-0926-SM-5S2RB	Heart	44.2713
GTEX-13OVI-2326-SM-5KM47	Salivary Gland	118.218
GTEX-ZYT6-1426-SM-5E43U	Nerve	279.829
GTEX-11WQK-2626-SM-5EQ4K	Stomach	31.7613
GTEX-131XF-2426-SM-5BC6C	Nerve	87.8335
GTEX-1212Z-0126-SM-59HK4	Skin	53.4012
GTEX-11NV4-2126-SM-5N9DS	Brain	5.72113
GTEX-139T8-0011-R3b-SM-5HL4R	Brain	1.801
GTEX-13PDP-0011-R6b-SM-5O9D5	Brain	3.50108
GTEX-13FHP-0926-SM-5L3EC	Thyroid	120.451
GTEX-WVLH-1426-SM-4MVNX	Esophagus	56.5126
GTEX-146FR-2426-SM-5NQAU	Vagina	103.293
GTEX-12584-1426-SM-5EGJ9	Lung	38.0705
GTEX-14ASI-0011-R8b-SM-5S2UB	Brain	5.70094
GTEX-XQ8I-0826-SM-4BOOE	Blood Vessel	18.3105
GTEX-1117F-1326-SM-5EGHH	Adipose Tissue	709.717
GTEX-13O3P-0226-SM-5KM3Z	Adipose Tissue	148.663
GTEX-WY7C-0126-SM-4ONCO	Spleen	175.084
GTEX-WHPG-1026-SM-3NMBA	Heart	125.688
GTEX-145MO-2226-SM-5Q5BN	Stomach	18.0109
GTEX-QLQ7-0008-SM-447AW	Skin	51.4893
GTEX-Y8DK-0011-R3A-SM-4RTW5	Brain	4.54097
GTEX-Q2AI-1526-SM-3GIJ3	Muscle	18.091
GTEX-QEG4-0626-SM-2S1OY	Muscle	36.0918
GTEX-13FHP-2426-SM-5KLZ5	Colon	387.325
GTEX-145MG-0011-R7b-SM-5P9JY	Brain	7.39116
GTEX-13FXS-1126-SM-5IJBB	Blood Vessel	228.429
GTEX-139UW-0426-SM-5K7V4	Blood Vessel	197.567
GTEX-13JVG-0011-R3b-SM-5LZXF	Brain	3.81108
GTEX-QV44-0126-SM-4R1KH	Spleen	176.106
GTEX-11NV4-0005-SM-5N9EX	Blood	0.521016
GTEX-13U4I-1126-SM-5LU3S	Esophagus	25.8107
GTEX-13CF3-0226-SM-5J1NW	Spleen	96.7105
GTEX-14A5I-2926-SM-5Q5CQ	Brain	2.77099
GTEX-ZYWO-0626-SM-5E45K	Heart	39.3912
GTEX-ZDYS-2426-SM-4WKGI	Skin	76.6705
GTEX-Y8E4-1226-SM-5IFIM	Adipose Tissue	195.863
GTEX-111CU-1326-SM-5NQ8L	Small Intestine	194.942
GTEX-QVUS-0011-R4A-SM-3GAE7	Brain	7.35079
GTEX-U8XE-0226-SM-4E3J3	Skin	135.027
GTEX-1399S-1226-SM-5J1O6	Esophagus	59.8716
GTEX-WH7G-0726-SM-3NMBM	Lung	18.1714
GTEX-111YS-1526-SM-5GZYW	Skin	22.5914
GTEX-ZC5H-0326-SM-5HL9F	Muscle	36.8017
GTEX-13111-1226-SM-5GCNC	Stomach	88.69
GTEX-WHSE-0011-R1A-SM-3P5ZK	Brain	3.07098
GTEX-ZYFG-1826-SM-5GZWX	Colon	58.6313
GTEX-NPJ8-2626-SM-26GMI	Brain	0.880992
GTEX-13PLJ-0005-SM-5NQ99	Blood	1.64103
GTEX-14C38-1226-SM-5S2UK	Blood Vessel	318.622
GTEX-11GSO-1926-SM-5A5K3	Breast	244.654
GTEX-PLZ6-1226-SM-3P5ZS	Testis	46.7016
GTEX-11ILO-0726-SM-5HL5I	Lung	92.2387
GTEX-ZLFU-1026-SM-5EQMZ	Esophagus	60.779
GTEX-WZTO-0011-R11A-SM-4E3K9	Brain	5.74099
GTEX-QVJO-0011-R10A-SM-2S1QJ	Brain	16.3815
GTEX-144FL-1526-SM-5Q5CA	Pancreas	17.2115
GTEX-13NYB-0011-R6b-SM-5MR51	Brain	9.08131
GTEX-P4QT-0526-SM-2I3EX	Lung	16.691
GTEX-RU72-0011-R2A-SM-2TF6O	Brain	2.42099
GTEX-WI4N-2026-SM-4OOS7	Kidney	0.371002
GTEX-ZZPU-0526-SM-5E44U	Lung	32.9316
GTEX-PSDG-0008-SM-48TE5	Skin	106.899
GTEX-QDVN-2126-SM-5SI7X	Adipose Tissue	76.7609
GTEX-QLQW-1326-SM-2S1QS	Muscle	25.4307
GTEX-WL46-0011-R6A-SM-3LK6X	Brain	9.6011
GTEX-117YX-2326-SM-5H12W	Skin	72.6908
GTEX-11P82-0926-SM-5986X	Salivary Gland	54.1204
GTEX-UPK5-1226-SM-4IHL8	Esophagus	30.4717
GTEX-13S7M-0005-SM-5NQ76	Blood	3.02095
GTEX-PW2O-0526-SM-2I3DX	Lung	45.3208
GTEX-11EI6-2226-SM-5EGJM	Testis	12.6907
GTEX-139YR-2726-SM-5K7VV	Blood Vessel	105.8
GTEX-OXRK-0226-SM-3NB2G	Skin	102.629
GTEX-11TUW-2226-SM-5EQL9	Testis	5.63103
GTEX-O5YT-0726-SM-3MJHA	Esophagus	61.5506
GTEX-XMK1-1326-SM-4B65Q	Esophagus	52.3203
GTEX-13111-0326-SM-5DUXF	Adrenal Gland	21.7403
GTEX-13OVI-2726-SM-5KM56	Skin	152.906
GTEX-14753-0011-R6b-SM-5S2UD	Brain	0.891002
GTEX-13IVO-0011-R8a-SM-5L3DY	Brain	5.47098
GTEX-ZAB4-0726-SM-5HL8I	Blood Vessel	140.371
GTEX-132Q8-0011-R5a-SM-5IJDM	Brain	4.72102
GTEX-ZQG8-1126-SM-51MRL	Vagina	133.14
GTEX-1211K-2226-SM-5FQU6	Adipose Tissue	94.5234
GTEX-ZF29-0826-SM-5S2NP	Adipose Tissue	120.467
GTEX-T6MN-0011-R4A-SM-5CHSD	Brain	0.000999989
GTEX-YECK-1926-SM-4W21H	Liver	75.5993
GTEX-13X6K-0011-R2b-SM-5P9K3	Brain	16.7908
GTEX-YJ8O-0326-SM-5RQJW	Esophagus	191.089
GTEX-RWSA-0126-SM-2XCBB	Skin	165.674
GTEX-TKQ1-0426-SM-4DXT4	Esophagus	30.9014
GTEX-13O61-2126-SM-5IJEO	Pancreas	41.0014
GTEX-XUW1-1126-SM-4BONZ	Blood Vessel	135.195
GTEX-145MG-3026-SM-5RQJA	Brain	5.78092
GTEX-X4XX-0726-SM-4QARS	Testis	21.1209
GTEX-14A5I-1726-SM-5QGQ5	Liver	10.7413
GTEX-13QBU-1326-SM-5LU4K	Adipose Tissue	136.004
GTEX-OHPL-0426-SM-3TW8X	Blood Vessel	156.813
GTEX-13OVH-3126-SM-5MR4Z	Pituitary	6.37091
GTEX-13O1R-0826-SM-5J2MB	Thyroid	58.2708
GTEX-ZTPG-2226-SM-57WF9	Vagina	71.1603
GTEX-ZAB4-0011-R9a-SM-4SOKG	Brain	14.1615
GTEX-WVLH-3026-SM-3MJG9	Brain	4.8909
GTEX-R55G-2326-SM-2TC61	Muscle	14.8305
GTEX-13O3O-0011-R5b-SM-5KM44	Brain	3.56104
GTEX-13OVJ-0011-R5a-SM-5P9H7	Brain	4.56116
GTEX-PSDG-0526-SM-2S1OH	Blood Vessel	30.771
GTEX-ZF29-0926-SM-4WKFZ	Skin	12.1813
GTEX-POYW-0426-SM-2XCEV	Nerve	112.462
GTEX-R55D-0008-SM-48FEV	Skin	41.8919
GTEX-13X6K-0011-R11a-SM-5P9F5	Brain	3.06099
GTEX-S3XE-1926-SM-3K2B3	Nerve	65.2814
GTEX-WYJK-0426-SM-3NM9G	Blood Vessel	21.2516
GTEX-WFG8-0826-SM-4LVN5	Blood Vessel	249.899
GTEX-Y8E4-0226-SM-4VBQ3	Blood Vessel	181.938
GTEX-YFC4-0226-SM-57WD2	Adipose Tissue	427.624
GTEX-WH7G-0426-SM-3NMBJ	Heart	42.5799
GTEX-13O3P-0726-SM-5J2OM	Thyroid	106.079
GTEX-WH7G-1026-SM-4LVML	Esophagus	30.1106
GTEX-11PRG-2826-SM-5BC54	Brain	3.67107
GTEX-ZDTS-0826-SM-4WKHL	Skin	121.701
GTEX-P44G-0011-R1A-SM-2I3FE	Brain	1.78102
GTEX-QLQ7-1726-SM-2S1QQ	Muscle	35.8699
GTEX-YEC3-0526-SM-4YCF2	Blood Vessel	188.602
GTEX-ZAB5-2326-SM-5IJFR	Salivary Gland	34.3515
GTEX-ZGAY-1126-SM-4WWBS	Esophagus	8.61111
GTEX-PWCY-0826-SM-48TCR	Esophagus	50.0501
GTEX-13JUV-0626-SM-5J1MQ	Adipose Tissue	452.54
GTEX-R53T-0226-SM-48FEH	Adrenal Gland	51.45
GTEX-11EQ8-0926-SM-5H12V	Skin	88.3893
GTEX-11H98-0426-SM-5HL55	Nerve	147.759
GTEX-13QIC-3026-SM-5LU58	Brain	3.22098
GTEX-QMRM-0008-SM-447B1	Skin	83.3321
GTEX-WYJK-1026-SM-3NM8W	Heart	35.3613
GTEX-YECK-0926-SM-4W214	Lung	63.8228
GTEX-S4Z8-0226-SM-4AD5K	Spleen	194.267
GTEX-111FC-0626-SM-5N9CU	Heart	90.9688
GTEX-WL46-0726-SM-3LK5Z	Heart	104.517
GTEX-12WSC-0011-R10a-SM-5GU57	Brain	5.0711
GTEX-X4LF-0526-SM-3NMB6	Lung	29.6015
GTEX-131XE-0326-SM-5LZVO	Liver	94.9832
GTEX-YECK-0326-SM-4W1YS	Skin	59.1702
GTEX-X5EB-0826-SM-46MVS	Heart	216.737
GTEX-12WSE-0826-SM-5S2VL	Lung	80.1816
GTEX-WRHK-0001-SM-4WWDD	Blood	0.271007
GTEX-POYW-1226-SM-5LU5O	Lung	62.979
GTEX-ZDYS-0526-SM-5L3EE	Blood Vessel	124.491
GTEX-ZYT6-0826-SM-5E43I	Blood Vessel	144.999
GTEX-PVOW-0726-SM-2XCF5	Blood Vessel	107.523
GTEX-X4XY-0006-SM-46MV2	Blood	0.291002
GTEX-WK11-2726-SM-3NMAQ	Skin	164.062
GTEX-13G51-0011-R1a-SM-5LZYR	Brain	15.9413
GTEX-13OVL-0011-R1a-SM-5L3H5	Brain	10.5407
GTEX-PX3G-1026-SM-48TZW	Pancreas	68.271
GTEX-13RTJ-2226-SM-5S2Q1	Kidney	48.7726
GTEX-O5YW-0526-SM-2YUMX	Lung	18.4111
GTEX-R53T-1126-SM-48FD4	Esophagus	32.14
GTEX-QDT8-0011-R9A-SM-32PKH	Brain	8.68123
GTEX-11EQ9-2226-SM-5987H	Blood Vessel	16.8807
GTEX-13IVO-0726-SM-5LZYV	Skin	31.6602
GTEX-ZE9C-2826-SM-5S2MO	Adipose Tissue	315.107
GTEX-12ZZZ-0226-SM-59HKU	Muscle	26.3312
GTEX-13PVQ-0326-SM-5K7YF	Muscle	22.6415
GTEX-OHPL-0526-SM-4M1XS	Lung	82.4016
GTEX-1313W-0011-R2a-SM-5EGLF	Brain	10.0512
GTEX-13QIC-1426-SM-5LU4V	Nerve	224.162
GTEX-N7MS-0011-R2a-SM-2HML6	Brain	7.50109
GTEX-QDT8-0011-R9A-SM-5SI8J	Brain	11.9712
GTEX-132AR-2726-SM-5PNVN	Colon	33.7403
GTEX-13N2G-0226-SM-5K7VF	Skin	95.1743
GTEX-13OW6-0011-R5a-SM-5O9BK	Brain	12.8812
GTEX-VUSG-1226-SM-4KKZF	Esophagus	14.7414
GTEX-QLQW-0326-SM-447A8	Pancreas	67.4619
GTEX-13NZA-0126-SM-5K7UH	Adipose Tissue	261.633
GTEX-YEC4-1026-SM-5P9FW	Esophagus	4.41098
GTEX-ZPIC-0002-SM-4WWEC	Blood	0.561011
GTEX-X4XY-0226-SM-4E3IZ	Skin	74.7706
GTEX-XUJ4-0326-SM-4BOP9	Blood Vessel	46.7826
GTEX-13N1W-0011-R9b-SM-5MR4R	Brain	3.06099
GTEX-ZDYS-2126-SM-5S2OD	Adipose Tissue	230.736
GTEX-11DYG-1226-SM-5N9DC	Blood Vessel	167.115
GTEX-S4UY-1026-SM-4AD53	Ovary	51.4714
GTEX-ZTSS-0005-SM-4YCDR	Blood	0.181005
GTEX-13NYB-0011-R2a-SM-5MR3C	Brain	11.9207
GTEX-XAJ8-1126-SM-47JYA	Nerve	73.9921
GTEX-Y114-0002-SM-4TT78	Blood	0.600985
GTEX-ZV68-0011-R2a-SM-4YCDK	Brain	3.43093
GTEX-111FC-1926-SM-5GZYC	Testis	8.201
GTEX-XUJ4-0626-SM-4BOOO	Heart	63.8405
GTEX-ZLV1-1226-SM-4WWBX	Colon	9.75134
GTEX-SJXC-0005-SM-2XCE7	Blood	0.34099
GTEX-XOT4-1426-SM-4B65T	Lung	53.2127
GTEX-11DXX-2626-SM-5Q5A3	Blood Vessel	57.3015
GTEX-Y5V6-2626-SM-5IFIX	Muscle	9.51102
GTEX-11ONC-2026-SM-5HL61	Colon	353.729
GTEX-QDT8-0226-SM-32PL4	Adipose Tissue	238.294
GTEX-TMZS-0126-SM-3DB9Q	Skin	87.1483
GTEX-WH7G-1626-SM-4LVMY	Small Intestine	37.0705
GTEX-13FHP-0126-SM-5IJBG	Skin	50.4926
GTEX-U8XE-0926-SM-3DB8V	Heart	57.9405
GTEX-Z9EW-0826-SM-5HL9T	Adipose Tissue	132.541
GTEX-U8XE-0726-SM-3DB8O	Muscle	27.3904
GTEX-SN8G-0226-SM-4DM6B	Adipose Tissue	224.178
GTEX-132QS-0426-SM-5KLZ6	Heart	32.2606
GTEX-U3ZM-0526-SM-4DXTB	Esophagus	9.84097
GTEX-Y114-0326-SM-4TT99	Blood Vessel	100.183
GTEX-11TUW-1726-SM-5BC5C	Liver	24.8109
GTEX-139T6-0426-SM-5IJEM	Lung	50.8826
GTEX-13QBU-0126-SM-5LU3V	Blood Vessel	151.765
GTEX-PLZ6-0526-SM-3P61C	Esophagus	8.78109
GTEX-RTLS-0426-SM-2TF5K	Blood Vessel	86.0796
GTEX-Y3IK-1226-SM-4WWEK	Esophagus	99.0716
GTEX-R55F-0008-SM-48FE6	Skin	2.28105
GTEX-13OVJ-0926-SM-5K7U1	Adipose Tissue	365.392
GTEX-13PVQ-1026-SM-5KM3M	Breast	187.663
GTEX-113IC-0526-SM-5HL76	Nerve	345.322
GTEX-PWCY-2026-SM-2S1NF	Muscle	6.8709
GTEX-11WQK-0726-SM-5GU71	Muscle	13.1711
GTEX-TMMY-0926-SM-4TT1Z	Lung	13.981
GTEX-11EQ9-2126-SM-5PNVW	Muscle	10.7711
GTEX-T5JW-0003-SM-3NMAD	Blood	0.501006
GTEX-WRHU-0826-SM-3MJFN	Muscle	46.6401
GTEX-14C5O-1726-SM-5RQI9	Esophagus	245.691
GTEX-VJYA-1926-SM-3GIJJ	Muscle	58.4528
GTEX-ZVZQ-0426-SM-59HLT	Adipose Tissue	102.558
GTEX-OIZG-0008-SM-4E3J2	Skin	515.883
GTEX-11VI4-0626-SM-5EQLO	Esophagus	43.7921
GTEX-WHSB-0526-SM-4M1XM	Esophagus	52.5712
GTEX-11EQ8-0826-SM-5N9FG	Thyroid	142.557
GTEX-QVJO-1826-SM-447C9	Breast	252.546
GTEX-145MH-2926-SM-5Q5D2	Brain	4.72102
GTEX-12584-0226-SM-5EQL5	Adipose Tissue	165.972
GTEX-13RTJ-0011-R7b-SM-5P9JS	Brain	5.06092
GTEX-14C39-2526-SM-5S2UH	Adipose Tissue	168.57
GTEX-V1D1-0326-SM-4JBIY	Blood Vessel	333.744
GTEX-OXRN-0126-SM-48TDM	Skin	59.031
GTEX-S4P3-0526-SM-4AD58	Esophagus	45.1014
GTEX-1313W-0011-R10b-SM-5DUXA	Brain	4.74103
GTEX-13OVI-0526-SM-5IFFQ	Pancreas	32.4715
GTEX-WWYW-0005-SM-3NB3K	Blood	0.38101
GTEX-ZC5H-2226-SM-4WAWS	Vagina	165.238
GTEX-12WSG-1026-SM-5EGII	Pancreas	53.7316
GTEX-NPJ8-1326-SM-3LK6B	Blood Vessel	88.9486
GTEX-WHSE-1626-SM-4M1XL	Esophagus	59.2729
GTEX-139TT-2126-SM-5LZWC	Skin	113.938
GTEX-12584-0426-SM-5FQTT	Blood Vessel	106.669
GTEX-P4PQ-0426-SM-3NMCI	Blood Vessel	112.058
GTEX-148VJ-0726-SM-5LU8J	Thyroid	149.531
GTEX-ZYT6-2326-SM-5GZY3	Skin	39.7202
GTEX-13FLV-0011-R3b-SM-5LZYP	Brain	3.62103
GTEX-ZT9W-2226-SM-57WFU	Testis	3.98091
GTEX-111CU-1526-SM-5N9FS	Prostate	39.8001
GTEX-13G51-0011-R7b-SM-5LZXG	Brain	6.62077
GTEX-S33H-2426-SM-2XCB2	Blood Vessel	254.337
GTEX-12WSN-1326-SM-5GCNT	Breast	67.9217
GTEX-X585-0011-R5A-SM-46MVI	Brain	14.8913
GTEX-N7MT-0326-SM-48TDP	Esophagus	51.4322
GTEX-1399T-0426-SM-5PNVJ	Heart	65.8723
GTEX-12WSE-0011-R7a-SM-5PNWF	Brain	3.0409
GTEX-13CF3-1826-SM-5J1NK	Muscle	14.0208
GTEX-139UW-0126-SM-5KM1B	Thyroid	99.6985
GTEX-14753-0426-SM-5NQAM	Skin	21.0114
GTEX-13N11-1726-SM-5J1OJ	Breast	415.441
GTEX-PVOW-0426-SM-5MR5R	Heart	63.5932
GTEX-11TT1-0126-SM-5LUAA	Adrenal Gland	22.7911
GTEX-13O3O-0826-SM-5K7WE	Breast	201.202
GTEX-U3ZM-1626-SM-4DXSK	Testis	7.18108
GTEX-13N2G-0011-R6b-SM-5MR3P	Brain	6.08096
GTEX-145LT-1926-SM-5QGP5	Nerve	128.169
GTEX-ZA64-1626-SM-5CVME	Testis	5.68082
GTEX-R55E-1126-SM-48FDZ	Blood Vessel	82.8196
GTEX-144GL-2026-SM-5LU3O	Breast	277.742
GTEX-12WSE-0011-R1b-SM-5GU4V	Brain	5.39118
GTEX-144GL-0226-SM-5QGOX	Adipose Tissue	386.976
GTEX-SIU8-0008-SM-4BRUC	Skin	233.601
GTEX-UTHO-0426-SM-5SI7N	Adipose Tissue	161.132
GTEX-SNOS-0326-SM-4DM6C	Blood Vessel	293.09
GTEX-T6MN-0726-SM-32PML	Breast	409.154
GTEX-S341-0006-SM-3NM8D	Blood	0.0810019
GTEX-132NY-1026-SM-5P9IY	Thyroid	56.6616
GTEX-Q2AH-0005-SM-5SI7G	Blood	0.171004
GTEX-UPIC-0326-SM-4IHJ9	Blood Vessel	34.171
GTEX-1313W-0326-SM-5LZU5	Nerve	240.585
GTEX-WEY5-0626-SM-4LMIA	Ovary	109.372
GTEX-ZXG5-2126-SM-59HKD	Skin	41.1209
GTEX-147F3-0526-SM-5SI98	Skin	30.9915
GTEX-PX3G-0226-SM-2S1OU	Adipose Tissue	331.072
GTEX-11ZUS-2126-SM-5N9E6	Prostate	75.5207
GTEX-WHWD-0005-SM-3LK7D	Blood	0.0810019
GTEX-13NYB-0626-SM-5MR47	Lung	71.1208
GTEX-S7SF-0626-SM-4AD4V	Stomach	41.3811
GTEX-14AS3-1526-SM-5Q5ED	Skin	63.1802
GTEX-Y114-0226-SM-4TT8W	Heart	73.7412
GTEX-111YS-2226-SM-5987P	Blood Vessel	52.6405
GTEX-13IVO-0426-SM-5LZY7	Nerve	90.4031
GTEX-R53T-0005-SM-3GADK	Blood	0.0909993
GTEX-RU72-0526-SM-2TF5Z	Lung	29.4011
GTEX-XV7Q-1626-SM-4BRWC	Vagina	290.703
GTEX-QCQG-0006-SM-5SI8M	Blood	0.171004
GTEX-QMRM-0926-SM-447BR	Esophagus	55.0702
GTEX-R55G-1626-SM-48FF4	Uterus	213.546
GTEX-11OF3-2526-SM-5P9JL	Muscle	42.7811
GTEX-145MN-0326-SM-5QGQI	Kidney	34.5018
GTEX-YFC4-0011-R10a-SM-4SOK5	Brain	7.45082
GTEX-XGQ4-1626-SM-4AT6J	Esophagus	44.2498
GTEX-XV7Q-1726-SM-4BRUU	Adipose Tissue	363.875
GTEX-13113-0526-SM-5GCN2	Blood Vessel	182.076
GTEX-13N1W-0011-R4a-SM-5MR52	Brain	4.56116
GTEX-ZTSS-0004-SM-4YCCS	Blood	2.51107
GTEX-1211K-2126-SM-59HJZ	Muscle	8.81096
GTEX-ZVT3-2626-SM-5GU5L	Ovary	42.0898
GTEX-13OVK-0006-SM-5O9B7	Blood	0.0410009
GTEX-13NZA-1726-SM-5J1NA	Pancreas	155.288
GTEX-144FL-0626-SM-5LU43	Skin	31.801
GTEX-ZV6S-0226-SM-59HJT	Thyroid	103.343
GTEX-WI4N-1126-SM-3LK7Q	Adipose Tissue	124.612
GTEX-P78B-1326-SM-3P611	Liver	25.1904
GTEX-WZTO-0011-R3B-SM-3NMC6	Brain	8.42105
GTEX-13NYC-2426-SM-5MR3K	Thyroid	64.9294
GTEX-13NYB-1326-SM-5K7Y1	Esophagus	229.651
GTEX-Y8E4-0626-SM-4WWDL	Skin	64.0488
GTEX-1212Z-0426-SM-5FQT6	Thyroid	51.6716
GTEX-11OF3-0011-R6b-SM-57WBG	Brain	4.54097
GTEX-XYKS-0226-SM-4BRW3	Heart	73.0798
GTEX-11EM3-1926-SM-5987U	Uterus	110.362
GTEX-VJYA-1826-SM-4KL1W	Blood Vessel	400.678
GTEX-11DXX-1926-SM-5EGJK	Colon	54.2406
GTEX-139D8-2326-SM-5IFGE	Stomach	53.1206
GTEX-13O3Q-2126-SM-5KM4C	Stomach	197.485
GTEX-12C56-1326-SM-5FQSV	Prostate	11.9812
GTEX-ZPCL-0006-SM-4WWAS	Blood	0.100998
GTEX-13OVH-3026-SM-5MR4N	Brain	2.32093
GTEX-13D11-1726-SM-5IFGQ	Heart	29.7703
GTEX-145LS-0526-SM-5LU8Y	Muscle	31.6515
GTEX-144FL-0426-SM-5O9A1	Nerve	124.302
GTEX-12WSA-0005-SM-5O9BM	Blood	0.0209995
GTEX-ZQUD-0926-SM-57WE3	Small Intestine	67.9923
GTEX-14753-1726-SM-5NQ9X	Adrenal Gland	2.75108
GTEX-YJ89-0011-R6a-SM-4V6GN	Brain	11.9414
GTEX-XOTO-0226-SM-4B66H	Adipose Tissue	346.762
GTEX-13NZ8-0226-SM-5J2OK	Thyroid	104.474
GTEX-QLQ7-1326-SM-4R1JY	Prostate	58.672
GTEX-13CF3-1626-SM-5IFG9	Esophagus	14.6609
GTEX-13FXS-0011-R10a-SM-5J2MA	Brain	5.83082
GTEX-WZTO-1526-SM-4PQYQ	Esophagus	330.774
GTEX-14753-1626-SM-5NQ9L	Liver	13.5011
GTEX-X8HC-0726-SM-46MWG	Thyroid	108.519
GTEX-12WSF-0011-R10a-SM-5LZVH	Brain	4.95093
GTEX-ZXG5-0326-SM-5GICH	Muscle	13.8806
GTEX-PX3G-0226-SM-3NB2C	Adipose Tissue	347.411
GTEX-S4Q7-0003-SM-3NM8M	Blood	0.861009
GTEX-S4P3-1626-SM-3K2AZ	Muscle	11.3208
GTEX-NFK9-0226-SM-2HMKQ	Skin	25.0112
GTEX-14A5I-0005-SM-5N9FU	Blood	0.190994
GTEX-11OC5-0006-SM-5N9FA	Blood	0.361007
GTEX-Y114-1426-SM-4TT6W	Small Intestine	48.4626
GTEX-REY6-0926-SM-48FDA	Blood Vessel	83.0323
GTEX-131XF-2026-SM-5DUWG	Testis	27.821
GTEX-1399R-0626-SM-5K7UZ	Blood Vessel	134.178
GTEX-13111-1426-SM-5DUW3	Small Intestine	164.29
GTEX-WFG7-0326-SM-5SI7L	Thyroid	77.8594
GTEX-12WSG-1426-SM-5FQUK	Ovary	55.1925
GTEX-131XF-1826-SM-5EGKG	Thyroid	70.3706
GTEX-ZPCL-1426-SM-57WEC	Esophagus	8.98115
GTEX-ZV68-0006-SM-4YCEJ	Blood	0.460988
GTEX-ZZ64-1726-SM-5GZYB	Skin	32.2516
GTEX-PX3G-1626-SM-2S1PT	Muscle	35.0806
GTEX-11ZUS-1426-SM-5FQSP	Muscle	19.1716
GTEX-Z9EW-0326-SM-5CVM8	Esophagus	32.9202
GTEX-WEY5-0426-SM-3GIKT	Heart	46.6919
GTEX-147F3-0226-SM-5NQBV	Muscle	13.1912
GTEX-OOBJ-1626-SM-2I3F7	Muscle	10.9511
GTEX-11P82-0626-SM-5PNYK	Esophagus	62.2413
GTEX-S4Q7-0126-SM-4AD5P	Spleen	133.149
GTEX-1269C-2626-SM-5EQ5C	Muscle	18.091
GTEX-QV44-1026-SM-447CG	Esophagus	66.3305
GTEX-S7SF-1426-SM-4AT5A	Vagina	42.4208
GTEX-OOBJ-3026-SM-3NB1D	Blood Vessel	144.077
GTEX-OXRL-0326-SM-4MVNY	Heart	30.1607
GTEX-Y3I4-0126-SM-4TT26	Spleen	236.189
GTEX-YEC3-1426-SM-4WWEM	Stomach	45.2611
GTEX-13OVI-1026-SM-5L3EM	Uterus	133.168
GTEX-NL3H-0011-R7a-SM-2I3G5	Brain	6.32121
GTEX-145MO-1326-SM-5Q5EF	Lung	76.5484
GTEX-ZLV1-2026-SM-5EQMB	Nerve	89.9593
GTEX-11ZVC-0011-R4a-SM-5BC6Z	Brain	8.28097
GTEX-X4XX-0126-SM-3NMC2	Skin	41.3524
GTEX-ZAK1-2926-SM-5HL9S	Brain	2.40094
GTEX-ZTX8-1226-SM-4YCE9	Breast	194.807
GTEX-X261-0626-SM-3NMD9	Breast	171.409
GTEX-12WSL-2626-SM-5GCNV	Blood Vessel	60.1003
GTEX-R55G-0226-SM-48FEI	Spleen	175.728
GTEX-12WSE-0926-SM-5S2VX	Heart	59.9297
GTEX-14ICL-1126-SM-5S2RE	Pancreas	26.8919
GTEX-12WSE-0011-R6b-SM-5LZV5	Brain	3.02095
GTEX-YF7O-0726-SM-4W213	Thyroid	35.6221
GTEX-ZG7Y-0926-SM-5EQ6O	Heart	23.6407
GTEX-QCQG-2126-SM-2S1P8	Muscle	14.811
GTEX-XQ3S-2526-SM-4BOOG	Prostate	36.8298
GTEX-13S86-0826-SM-5SI6J	Esophagus	16.8807
GTEX-TSE9-2726-SM-4DXSQ	Cervix Uteri	241.186
GTEX-11UD2-0426-SM-5EQ5W	Nerve	180.593
GTEX-Y3I4-1326-SM-4TT8Z	Small Intestine	64.6599
GTEX-111YS-0008-SM-5Q5BH	Skin	68.2331
GTEX-13O3O-0426-SM-5KM2Y	Blood Vessel	117.972
GTEX-PWOO-0006-SM-2I3E3	Blood	0.0209995
GTEX-11EQ9-1326-SM-5985X	Small Intestine	25.6005
GTEX-14753-1926-SM-5NQAA	Esophagus	63.9512
GTEX-OXRP-0326-SM-33HBJ	Thyroid	26.771
GTEX-111CU-0926-SM-5EGIK	Stomach	6.60107
GTEX-13VXT-0426-SM-5LU57	Nerve	64.3024
GTEX-WY7C-2726-SM-3NB3P	Breast	94.9437
GTEX-OHPN-2926-SM-3LK65	Nerve	172.985
GTEX-QEG4-0426-SM-5S2VQ	Heart	38.7923
GTEX-139TS-0011-R6a-SM-5J2OB	Brain	4.17102
GTEX-ZZPT-2926-SM-5EQ5S	Brain	1.90105
GTEX-145MI-0011-R4b-SM-5PNZH	Brain	2.11096
GTEX-QLQW-0726-SM-447AA	Stomach	5.25103
GTEX-13G51-2526-SM-5LZYK	Skin	201.705
GTEX-ZTPG-1226-SM-4YCDO	Heart	46.7502
GTEX-NFK9-0926-SM-2HMJU	Heart	15.5011
GTEX-XOTO-0006-SM-4B64T	Blood	0.680987
GTEX-WHWD-0126-SM-4OORS	Spleen	299.518
GTEX-148VJ-0826-SM-5LU8V	Lung	39.4513
GTEX-11EQ9-0926-SM-5HL6I	Esophagus	31.9402
GTEX-QV31-0626-SM-447C5	Stomach	4.90108
GTEX-13OW8-2926-SM-5L3FV	Brain	4.07105
GTEX-11EQ9-0006-SM-5LUB6	Blood	0.121002
GTEX-13FTX-1526-SM-5K7VJ	Skin	43.3602
GTEX-ZQG8-0008-SM-4YCE7	Skin	357.03
K-562-SM-5GZWN	Bone Marrow	0.100998
GTEX-12WSN-1826-SM-5LZUT	Esophagus	84.7417
GTEX-13FTW-2626-SM-5K7WL	Skin	16.1012
GTEX-NPJ7-0011-R1a-SM-3GACT	Brain	8.34088
GTEX-ZVT2-0426-SM-5E44S	Uterus	166.653
GTEX-Y3IK-0226-SM-51MRJ	Adrenal Gland	33.1606
GTEX-11ONC-2826-SM-5P9GQ	Pituitary	26.2601
GTEX-145LS-0011-R3a-SM-5S2VJ	Brain	10.7413
GTEX-131XH-0226-SM-5LZVB	Heart	20.7207
GTEX-ZTX8-0526-SM-59HLD	Small Intestine	21.2207
GTEX-145LT-1626-SM-5O992	Muscle	10.4208
GTEX-13RTJ-2126-SM-5S2PZ	Prostate	55.1198
K-562-SM-5PNWU	Bone Marrow	0.0309997
GTEX-11DXY-0126-SM-5H11Q	Skin	66.4824
GTEX-TML8-1326-SM-4DXTO	Colon	30.0002
GTEX-11NUK-3126-SM-5986M	Pituitary	26.721
GTEX-QLQW-0626-SM-447A6	Esophagus	83.4592
GTEX-RN64-1826-SM-48FDV	Liver	48.8505
GTEX-11ZVC-0011-R1b-SM-5BC6M	Brain	9.68129
GTEX-113IC-0008-SM-5QGRF	Skin	131.089
GTEX-X8HC-1626-SM-46MWE	Heart	20.2914
GTEX-X15G-0926-SM-4PQZE	Esophagus	71.2096
GTEX-12KS4-0826-SM-5BC5R	Muscle	23.2008
GTEX-OHPN-0011-R10A-SM-5S2U3	Brain	14.5415
GTEX-WYBS-1626-SM-4ONCA	Esophagus	145.432
GTEX-YFC4-0011-R9a-SM-4SOK4	Brain	18.3207
K-562-SM-32PLC	Bone Marrow	0.061002
GTEX-11LCK-1226-SM-5Q5AM	Muscle	10.5707
GTEX-WZTO-0826-SM-3NM8Q	Muscle	49.5118
GTEX-13D11-2226-SM-5IFEO	Pancreas	47.3404
GTEX-REY6-1026-SM-2TF4Y	Heart	28.83
GTEX-OXRO-2026-SM-2YUMZ	Heart	13.4814
GTEX-ZAB4-0011-R11a-SM-4SOKI	Brain	3.68101
GTEX-11VI4-0326-SM-5EQ6L	Stomach	93.6885
GTEX-13X6K-0526-SM-5LU51	Blood Vessel	105.011
GTEX-U8XE-0526-SM-3DB8R	Nerve	78.1135
GTEX-WFG7-0926-SM-4LMK7	Blood Vessel	104.75
GTEX-13OW6-2526-SM-5IJEC	Stomach	7.65074
GTEX-Q2AH-0526-SM-2I3ED	Heart	16.661
GTEX-XV7Q-0005-SM-4BRWI	Blood	22.151
GTEX-ZYFD-3026-SM-5E44C	Brain	2.46092
GTEX-13NYS-0011-R8a-SM-5MR5H	Brain	1.881
GTEX-X261-0011-R8A-SM-4E3I5	Brain	15.2813
GTEX-147GR-2826-SM-5RQK8	Colon	283.715
GTEX-ZV6S-0003-SM-4YCCT	Blood	0.781003
GTEX-ZUA1-0011-R1a-SM-4YCE2	Brain	10.4107
GTEX-ZYFD-0626-SM-5E44E	Skin	71.3529
GTEX-ZYT6-0926-SM-5GIEM	Heart	72.4794
GTEX-111YS-0426-SM-5987O	Heart	19.9304
GTEX-ZDYS-0126-SM-5HL6X	Blood Vessel	232.696
GTEX-XUZC-0008-SM-4BOQG	Skin	253.879
GTEX-Y3IK-2226-SM-4YCD4	Vagina	105.208
GTEX-O5YV-1126-SM-3LK73	Adrenal Gland	36.4614
GTEX-1399T-2826-SM-5KLYZ	Skin	42.0811
GTEX-ZLWG-2226-SM-5DUWO	Adipose Tissue	89.1399
GTEX-WWYW-0008-SM-4MVPF	Skin	879.659
GTEX-145MI-3126-SM-5Q5CF	Brain	1.98096
GTEX-WI4N-2226-SM-4OOS9	Colon	122.285
GTEX-OHPJ-0726-SM-2YUNM	Nerve	51.2507
GTEX-13JVG-0426-SM-5MR59	Blood Vessel	229.683
GTEX-RUSQ-0426-SM-47JWR	Blood Vessel	125.923
GTEX-12ZZX-0011-R8a-SM-5DUW8	Brain	10.4208
GTEX-14AS3-0226-SM-5Q5B6	Thyroid	133.584
GTEX-13NYS-3126-SM-5KLYV	Brain	4.29096
GTEX-T2IS-2226-SM-4DM65	Uterus	1024.14
GTEX-13OW6-2726-SM-5J2OE	Skin	134.029
GTEX-13OW8-0011-R8a-SM-5L3G5	Brain	8.08081
GTEX-11WQC-0011-R10a-SM-57WCT	Brain	6.10081
GTEX-132QS-0326-SM-5IJFN	Thyroid	70.6932
GTEX-QXCU-1126-SM-48FE5	Esophagus	117.043
GTEX-145MN-0226-SM-5QGPY	Adrenal Gland	45.9502
GTEX-YJ8A-0526-SM-5IFHT	Adipose Tissue	207.117
GTEX-S3XE-0526-SM-4AD4G	Pancreas	50.4122
GTEX-SIU7-1126-SM-2XCDW	Thyroid	12.7807
GTEX-XLM4-1526-SM-4AT6D	Testis	9.28113
GTEX-X4XX-0011-R2A-SM-3P623	Brain	6.55093
GTEX-147F4-2526-SM-5NQBB	Adrenal Gland	12.0712
GTEX-139TU-0626-SM-5KM3X	Breast	232.728
GTEX-Y8LW-0726-SM-5IFI1	Esophagus	4.21111
GTEX-ZXG5-0426-SM-5GICT	Nerve	250.784
GTEX-Y3I4-1126-SM-4TT7Y	Colon	60.5099
GTEX-QDVN-2326-SM-2S1PF	Blood Vessel	97.7822
GTEX-12WSC-2826-SM-5BC5Y	Skin	150.05
GTEX-ZT9X-1926-SM-57WE7	Adipose Tissue	327.579
GTEX-WZTO-0011-R6B-SM-4E3J6	Brain	6.85093
GTEX-11ZUS-0011-R8a-SM-5BC73	Brain	5.15117
GTEX-X3Y1-0726-SM-3P5YU	Pancreas	16.1113
GTEX-WHSE-0011-R8A-SM-3P5Z1	Brain	3.9611
GTEX-ZP4G-2026-SM-57WEH	Muscle	15.1306
GTEX-1122O-0226-SM-5N9DA	Thyroid	86.8588
GTEX-13FTW-0426-SM-5K7X2	Adipose Tissue	247.057
GTEX-13N1W-3126-SM-5IFHB	Pituitary	5.68082
GTEX-XPVG-0326-SM-4B653	Pancreas	38.7413
GTEX-145ME-0926-SM-5O9AR	Small Intestine	114.381
GTEX-PLZ6-1426-SM-5S2TR	Skin	22.2711
GTEX-QCQG-1626-SM-48U26	Colon	25.0615
GTEX-T6MN-0011-R6A-SM-5CHQD	Brain	0.000999989
GTEX-Z9EW-1726-SM-5CVMO	Muscle	7.67092
GTEX-117YX-1126-SM-5H128	Heart	15.6306
GTEX-T2IS-1926-SM-4DM74	Vagina	288.755
GTEX-11NUK-1026-SM-5HL5J	Thyroid	146.83
GTEX-13X6I-0011-R8a-SM-5PNZF	Brain	2.841
K-562-SM-4IHK7	Bone Marrow	0.110998
GTEX-12WSA-0326-SM-5BC6I	Adipose Tissue	81.7303
GTEX-1192W-3026-SM-5GZZV	Pituitary	6.44107
GTEX-11OF3-0011-R5a-SM-57WB4	Brain	11.5707
GTEX-XV7Q-1026-SM-4BRVR	Esophagus	76.3206
GTEX-O5YT-1326-SM-3MJGR	Adrenal Gland	70.5806
GTEX-13FXS-0011-R5b-SM-5LZYE	Brain	10.9011
GTEX-WL46-0011-R1A-SM-3LK6M	Brain	7.99113
GTEX-NPJ8-1526-SM-2D7VU	Brain	3.75106
GTEX-XLM4-0004-SM-4AT5I	Blood	0.220997
GTEX-ZAB4-3126-SM-57WCJ	Pituitary	11.0112
GTEX-Y3I4-0226-SM-4TT27	Thyroid	67.2518
GTEX-R55G-2126-SM-2TC67	Nerve	137.311
GTEX-13IVO-0011-R3b-SM-5IJBJ	Brain	4.00111
GTEX-Y5V6-0005-SM-4V6FD	Blood	0.130996
GTEX-145LU-2026-SM-5Q5E8	Muscle	40.5407
GTEX-Y114-0526-SM-4TT8V	Adrenal Gland	29.1717
GTEX-14ASI-3026-SM-5S2PN	Brain	5.57086
GTEX-11ZUS-2726-SM-5FQUA	Testis	3.02095
GTEX-X15G-0526-SM-3NMB7	Thyroid	228.255
GTEX-13OW7-0526-SM-5J1N2	Nerve	185.246
GTEX-13W3W-1126-SM-5L3DO	Adipose Tissue	135.655
GTEX-T5JC-0426-SM-32PLO	Skin	143.758
GTEX-13PL7-0326-SM-5IJEK	Esophagus	59.9007
GTEX-13FXS-0011-R11a-SM-5L3DM	Brain	3.12098
GTEX-13NYC-2626-SM-5K7VN	Salivary Gland	114.024
GTEX-OHPM-0326-SM-33HCA	Heart	39.1516
GTEX-RM2N-0826-SM-48FD3	Stomach	5.49112
GTEX-ZTSS-0626-SM-59867	Esophagus	6.58097
GTEX-Z93S-2826-SM-57WBL	Brain	3.74094
GTEX-TMKS-0126-SM-3DB7S	Skin	236.419
GTEX-Y9LG-0006-SM-4VBRK	Blood	0.240999
GTEX-1399R-0426-SM-5IJE3	Pancreas	61.2824
GTEX-145LT-1026-SM-5LU9O	Small Intestine	28.82
GTEX-X4XY-0626-SM-4E3IN	Muscle	24.0206
GTEX-11DXW-0326-SM-5H11W	Adipose Tissue	553.715
GTEX-11DXZ-1626-SM-5GIDI	Colon	158.364
GTEX-ZAJG-3126-SM-5HL9J	Brain	5.21114
GTEX-ZYY3-0826-SM-5E44R	Pancreas	63.7918
GTEX-12ZZW-0011-R4a-SM-5DUX9	Brain	2.49096
GTEX-13QIC-0011-R10a-SM-5O9C7	Brain	7.27123
GTEX-XUJ4-0226-SM-4BOP8	Spleen	114.072
GTEX-WFG8-1026-SM-4LVMZ	Esophagus	44.8209
GTEX-145MF-1526-SM-5LU95	Esophagus	349.343
GTEX-YEC3-2526-SM-5CVLS	Esophagus	5.65098
GTEX-P78B-1826-SM-3P5YX	Stomach	28.4016
GTEX-YFCO-1226-SM-5LUAT	Skin	26.1511
GTEX-PW2O-0006-SM-2I3DV	Blood	0.0410009
GTEX-Q2AI-0326-SM-2I3EK	Thyroid	86.4024
GTEX-13RTJ-0011-R2a-SM-5PNW9	Brain	4.74103
GTEX-SUCS-1026-SM-5CHTC	Colon	0.000999989
GTEX-WOFL-0626-SM-3MJG3	Muscle	107.792
GTEX-WFG8-1726-SM-4LVM6	Colon	32.5706
GTEX-X638-0008-SM-47JZ7	Skin	871.405
GTEX-11NSD-1226-SM-5986Q	Esophagus	86.7625
GTEX-13PL7-1026-SM-5MR5C	Adrenal Gland	37.742
GTEX-145MI-0526-SM-5O9A8	Skin	95.5643
GTEX-13CZV-0011-R3a-SM-5KM27	Brain	3.01091
GTEX-WYVS-0726-SM-4ONDO	Esophagus	15.8115
GTEX-13FHO-0326-SM-5IJBH	Adipose Tissue	655.022
GTEX-YEC3-1126-SM-5IFIH	Blood Vessel	74.1102
GTEX-131XW-3226-SM-5LZUO	Pituitary	5.54082
GTEX-P4PQ-0226-SM-2S1NK	Adipose Tissue	175.716
GTEX-145MO-2126-SM-5Q5CZ	Pancreas	37.6506
GTEX-X5EB-2326-SM-46MW5	Muscle	13.9008
GTEX-12WSK-2626-SM-5GCOT	Nerve	130.138
GTEX-1313W-3226-SM-5LZUU	Pituitary	29.3218
GTEX-Y114-0726-SM-4TT6U	Spleen	120.442
GTEX-11NSD-1126-SM-5N9BQ	Esophagus	15.3206
GTEX-WI4N-2426-SM-4OOSC	Uterus	62.6829
GTEX-Y111-2926-SM-4TT25	Pituitary	44.7309
GTEX-12ZZX-0011-R6a-SM-5HL8L	Brain	7.32079
GTEX-UPIC-1426-SM-4IHLQ	Vagina	90.9121
GTEX-11ZTS-3226-SM-5EGID	Brain	3.67107
GTEX-13S86-1126-SM-5RQJX	Thyroid	115.632
GTEX-XQ8I-0226-SM-4BOPM	Heart	31.3915
GTEX-U3ZN-0006-SM-3DB7Y	Blood	0.600985
GTEX-11DYG-0126-SM-59883	Skin	57.7721
GTEX-PWN1-0008-SM-48TEA	Skin	285.313
GTEX-X4XY-0326-SM-46MVZ	Adipose Tissue	190.217
GTEX-11PRG-0008-SM-5S2N5	Skin	235.095
GTEX-13SLW-0011-R1a-SM-5S2W7	Brain	3.56104
GTEX-N7MT-1026-SM-3TW8T	Pituitary	15.3206
GTEX-YEC3-0926-SM-5Q5AC	Adipose Tissue	86.4803
GTEX-Q2AG-3026-SM-48U1L	Pituitary	10.7012
GTEX-1122O-0926-SM-5N9C9	Adipose Tissue	53.4901
GTEX-Q2AG-0426-SM-2S1PU	Muscle	29.3909
GTEX-146FR-1726-SM-5Q5DT	Muscle	15.851
GTEX-SNOS-0526-SM-4DM54	Bladder	12.3411
GTEX-XBEC-1226-SM-4AT65	Heart	51.7003
GTEX-11DZ1-2426-SM-5GZZX	Skin	93.7925
GTEX-13W3W-0005-SM-5SI9Y	Blood	0.220997
GTEX-11DYG-0006-SM-5NQB2	Blood	0.061002
GTEX-T5JW-2026-SM-4DM63	Breast	219.336
GTEX-ZVP2-1626-SM-5GU5D	Stomach	2.65093
GTEX-RNOR-0011-R4A-SM-3GAD3	Brain	7.03085
GTEX-111YS-1226-SM-5EGGJ	Pancreas	34.6504
GTEX-1192W-0226-SM-5EGGT	Heart	66.6023
GTEX-ZV6S-1426-SM-59HKX	Ovary	184.388
GTEX-ZZPU-1426-SM-5GZZ6	Stomach	21.4916
GTEX-S7SE-0011-R6A-SM-2XCD9	Brain	13.801
GTEX-ZTTD-2626-SM-57WEX	Colon	107.27
GTEX-OXRP-0006-SM-2I3FN	Blood	0.480997
GTEX-Y114-1926-SM-4TT8J	Vagina	127.213
GTEX-RU72-0008-SM-46MV8	Skin	545.109
GTEX-1399R-0126-SM-5IFEV	Thyroid	153.224
GTEX-U3ZM-0826-SM-4DXU6	Bladder	46.7016
GTEX-WZTO-0011-R1B-SM-3NMAR	Brain	11.1209
GTEX-11EI6-0326-SM-5EQ6G	Muscle	23.7409
GTEX-13OVG-0326-SM-5KM57	Lung	20.4213
GTEX-ZC5H-0226-SM-4WAY9	Skin	211.293
GTEX-Y5V6-1026-SM-4VBS2	Esophagus	25.5013
GTEX-111FC-0526-SM-5GZZ8	Nerve	208.038
GTEX-13FTX-0526-SM-5IFGS	Esophagus	10.9914
GTEX-WFON-0005-SM-3NMC9	Blood	0.0810019
GTEX-O5YV-2026-SM-26GMK	Muscle	14.3911
GTEX-ZLV1-1326-SM-4WWER	Colon	66.0506
GTEX-ZF28-0226-SM-5S2OE	Adipose Tissue	253.229
GTEX-YECK-0005-SM-4W217	Blood	1.01101
GTEX-ZF29-1526-SM-4WKF7	Stomach	6.59101
GTEX-13W3W-2526-SM-5SI9P	Adipose Tissue	116.171
GTEX-ZF2S-3026-SM-4WWCH	Liver	76.6227
GTEX-ZAK1-2526-SM-5S2N7	Uterus	243.251
GTEX-WZTO-0326-SM-4PQYZ	Testis	7.16119
GTEX-RNOR-2426-SM-48FDY	Pituitary	9.20106
GTEX-144GL-0011-R6a-SM-5P9HW	Brain	9.75134
GTEX-N7MS-2625-SM-3LK77	Pituitary	17.7605
GTEX-13JVG-1426-SM-5MR4W	Lung	98.2101
GTEX-13OW6-0005-SM-5NQ9Z	Blood	2.01098
GTEX-11O72-2326-SM-5BC7H	Thyroid	171.695
GTEX-ZP4G-0006-SM-4WWE6	Blood	0.300993
GTEX-13FHP-2926-SM-5IJG9	Brain	4.58112
GTEX-WL46-0011-R10A-SM-3MJFQ	Brain	8.24089
GTEX-WXYG-0826-SM-4ONC7	Pancreas	41.2408
GTEX-13S7M-3026-SM-5S2QQ	Brain	1.67099
GTEX-S33H-1626-SM-4AD68	Liver	92.7516
GTEX-W5WG-0008-SM-4KL25	Skin	124.837
GTEX-145MH-0011-R11a-SM-5P9HQ	Brain	3.9611
GTEX-13OVL-0011-R6a-SM-5L3G4	Brain	6.56093
GTEX-13RTJ-0726-SM-5QGQN	Heart	23.5312
GTEX-WRHU-0726-SM-3MJFL	Blood Vessel	380.17
GTEX-13OVI-2126-SM-5KM3U	Colon	72.0087
GTEX-ZT9W-1426-SM-4YCD2	Esophagus	29.8612
GTEX-ZT9W-0003-SM-4YCE6	Blood	10.3209
GTEX-XAJ8-0126-SM-47JYG	Spleen	79.9098
GTEX-1477Z-0011-R3b-SM-5PNX9	Brain	3.54111
GTEX-13SLW-2926-SM-5Q5BQ	Pituitary	5.0711
GTEX-QDT8-0426-SM-32PKZ	Blood Vessel	186.69
GTEX-13NZ8-0926-SM-5MR3U	Adipose Tissue	236.026
GTEX-OXRO-0326-SM-33HBM	Lung	57.6321
GTEX-13X6K-0326-SM-5Q5D6	Muscle	26.9404
GTEX-ZF3C-1326-SM-5A5MF	Blood Vessel	354.834
GTEX-X261-0011-R7A-SM-4E3JJ	Brain	2.841
GTEX-NPJ7-0011-R8a-SM-2I3G2	Brain	5.83082
GTEX-ZYVF-2826-SM-5GIDK	Colon	71.2491
GTEX-WHSE-0006-SM-3NMBW	Blood	0.32099
GTEX-X261-0011-R11A-SM-4E3JY	Brain	1.92106
GTEX-12ZZZ-0011-R4b-SM-5DUV7	Brain	4.25099
GTEX-XBEC-0626-SM-4QARY	Muscle	14.8913
GTEX-132AR-1926-SM-5EGK5	Heart	61.8799
GTEX-V955-0726-SM-3GAFG	Heart	32.1311
GTEX-12WSN-0726-SM-5GCMS	Thyroid	31.0001
GTEX-PSDG-1326-SM-48TD2	Esophagus	13.9008
GTEX-1399S-1526-SM-5P9JC	Esophagus	48.0612
GTEX-11WQC-0011-R11b-SM-57WD6	Brain	2.47101
GTEX-TMMY-1326-SM-4DXU9	Pancreas	36.6007
GTEX-X4EO-0326-SM-3P5YO	Skin	365.899
GTEX-XUJ4-2826-SM-4BOQ2	Blood Vessel	62.1508
GTEX-XLM4-0011-R4B-SM-4AT5C	Brain	4.51085
GTEX-R3RS-0126-SM-3GIJL	Skin	102.601
GTEX-ZV6S-0826-SM-5NQ6Z	Spleen	167.336
GTEX-ZDYS-0626-SM-5J2N5	Thyroid	108.188
GTEX-11DXX-0926-SM-5H112	Pancreas	48.4693
GTEX-1399S-0826-SM-5KM23	Heart	35.1511
GTEX-ZVZQ-0008-SM-51MSK	Skin	252.231
GTEX-1399U-0926-SM-5IFHA	Pancreas	60.5099
GTEX-11P82-1226-SM-5HL5P	Colon	178.948
GTEX-YFC4-0011-R11a-SM-4SOK6	Brain	7.45082
GTEX-ZXG5-0005-SM-57WCN	Blood	0.300993
GTEX-131XW-0526-SM-5PNXZ	Adipose Tissue	663.568
GTEX-ZGAY-1526-SM-4WWEO	Esophagus	45.4308
GTEX-12WS9-0726-SM-5FQT7	Thyroid	92.373
GTEX-13NZA-0011-R9b-SM-5MR5I	Brain	9.53082
GTEX-11ZTS-1926-SM-5CVLA	Ovary	38.6206
GTEX-ZTX8-0006-SM-4YCE4	Blood	0.190994
GTEX-OXRL-2126-SM-3NM98	Testis	7.60106
GTEX-T6MO-0326-SM-32QOK	Breast	97.9993
GTEX-X261-0011-R10B-SM-4E3JT	Brain	4.42108
GTEX-117YX-1426-SM-5H12H	Breast	161.792
GTEX-YJ8O-0226-SM-5S2NL	Blood Vessel	90.8617
GTEX-Y8E5-0526-SM-57WBY	Nerve	408.389
GTEX-11ZUS-0226-SM-5FQT8	Heart	40.2914
GTEX-Z9EW-1626-SM-5CVMN	Skin	58.3516
GTEX-11WQK-0005-SM-5O9AV	Blood	0.110998
GTEX-XMD2-0006-SM-4WWEG	Blood	0.941022
GTEX-12ZZX-1226-SM-5EGHS	Thyroid	158.035
GTEX-XMK1-2226-SM-4B673	Adipose Tissue	308.537
GTEX-13N2G-2726-SM-5J1MG	Adipose Tissue	231.457
GTEX-TMMY-1026-SM-4DXTI	Blood Vessel	62.8221
GTEX-XUJ4-0005-SM-4BOQ6	Blood	0.271007
GTEX-11EI6-2426-SM-5PNVS	Stomach	268.914
GTEX-XOTO-0011-R3A-SM-4B64W	Brain	3.38112
GTEX-ZP4G-1626-SM-57WGD	Small Intestine	64.4988
GTEX-11EI6-0126-SM-5985R	Skin	139.353
GTEX-11OF3-0006-SM-5O9CM	Blood	0.680987
GTEX-14A5I-1326-SM-5SIAQ	Blood Vessel	79.7327
GTEX-WY7C-0726-SM-4ONCB	Liver	27.9815
GTEX-1445S-3026-SM-5O9BR	Brain	1.41098
GTEX-O5YT-1626-SM-32PK6	Muscle	24.0906
GTEX-13O3Q-0011-R2b-SM-5KM3K	Brain	8.91108
GTEX-13S86-1226-SM-5S2OA	Breast	192.351
GTEX-PVOW-0426-SM-5N9DW	Heart	82.162
GTEX-1314G-1326-SM-5BC6E	Skin	201.509
GTEX-145LV-0326-SM-5Q5BW	Heart	14.7506
GTEX-QCQG-1926-SM-2S1PI	Blood Vessel	75.6884
GTEX-S33H-1826-SM-4AD65	Prostate	25.1206
GTEX-YB5E-1926-SM-5IFIG	Testis	9.3211
GTEX-ZT9W-1126-SM-57WDR	Skin	45.2799
GTEX-WWYW-0011-R7A-SM-3NB3H	Brain	3.81108
GTEX-ZE7O-0011-R1a-SM-57WDM	Brain	3.90088
GTEX-YJ89-0011-R5a-SM-4V6GM	Brain	4.76112
GTEX-RTLS-0626-SM-5SI7Z	Thyroid	195.226
GTEX-13FTX-0926-SM-5IFF7	Ovary	35.6715
GTEX-147JS-1026-SM-5S2MP	Adipose Tissue	274.583
GTEX-NPJ8-0126-SM-2YUNR	Skin	60.1211
GTEX-O5YV-0526-SM-2D7VZ	Lung	78.7332
GTEX-148VJ-0326-SM-5QGQE	Muscle	22.3113
GTEX-XGQ4-0426-SM-4AT4I	Thyroid	83.3783
GTEX-U3ZN-0426-SM-4DXSH	Blood Vessel	162.94
GTEX-13O3Q-0011-R5b-SM-5P9H4	Brain	9.31077
GTEX-ZYFC-1626-SM-5N9EU	Esophagus	184.145
GTEX-12WSM-1426-SM-5GCPA	Colon	79.9929
GTEX-12BJ1-0726-SM-5EGGF	Spleen	183.165
GTEX-147F4-0011-R6b-SM-5S2UP	Brain	2.96103
GTEX-1192W-0005-SM-5NQBQ	Blood	0.371002
GTEX-13N2G-0011-R1b-SM-5MR3G	Brain	9.62109
GTEX-145MG-3126-SM-5Q5D3	Brain	5.33098
GTEX-YB5K-1626-SM-5IFIN	Breast	106.079
GTEX-139UC-3026-SM-5IJE4	Pituitary	5.4009
GTEX-OIZG-1126-SM-2HMIU	Heart	37.4605
GTEX-R55F-1426-SM-2TF53	Adipose Tissue	442.214
GTEX-ZV6S-1626-SM-5NQ81	Adipose Tissue	147.861
GTEX-WZTO-0626-SM-4PQYY	Liver	27.1617
GTEX-13X6I-2726-SM-5Q5ET	Colon	369.006
GTEX-ZVT4-0126-SM-51MS1	Skin	154.386
GTEX-PWCY-0526-SM-2I3ER	Heart	44.4219
GTEX-ZVT2-1826-SM-5NQ8W	Breast	141.632
GTEX-WY7C-2226-SM-4ONCS	Testis	18.1815
GTEX-11P82-0826-SM-5P9GU	Small Intestine	69.1904
GTEX-ZYT6-1726-SM-5E44P	Heart	34.392
GTEX-12ZZX-0011-R11a-SM-5DUVJ	Brain	4.26102
GTEX-P78B-2526-SM-3P5ZY	Uterus	490.701
GTEX-SUCS-0226-SM-32PLQ	Thyroid	86.8287
GTEX-13X6J-0126-SM-5QGOU	Skin	125.435
K-562-SM-5O98J	Bone Marrow	0.100998
GTEX-11WQK-0226-SM-5EQLI	Heart	46.8605
GTEX-148VJ-1526-SM-5Q5DU	Heart	27.3203
GTEX-W5X1-2626-SM-4LMI8	Adipose Tissue	861.615
GTEX-11EQ8-2826-SM-5N9C1	Brain	2.55107
GTEX-W5WG-1726-SM-4LMI5	Stomach	5.14083
GTEX-XXEK-0426-SM-4BRVW	Esophagus	37.5802
GTEX-11EQ9-2526-SM-5HL66	Adipose Tissue	84.2497
K-562-SM-33HC7	Bone Marrow	0.240999
GTEX-13RTJ-0011-R3a-SM-5PNX7	Brain	4.88108
GTEX-ZAB5-0526-SM-5CVMU	Spleen	278.88
GTEX-11EM3-0126-SM-5985K	Thyroid	92.3794
GTEX-145MI-0626-SM-5SI8S	Skin	31.531
GTEX-T6MO-1626-SM-32QOM	Skin	18.8109
GTEX-Y5V6-2126-SM-4WWFX	Breast	117.06
GTEX-PX3G-0426-SM-48U1C	Blood Vessel	215.284
GTEX-XPVG-0526-SM-4B65N	Kidney	16.6413
GTEX-NFK9-1526-SM-3LK7B	Stomach	11.4011
GTEX-X88G-0004-SM-47JZ6	Blood	0.980983
GTEX-XQ8I-1926-SM-4BOOK	Pancreas	30.0002
GTEX-145ME-0726-SM-5O9A3	Adipose Tissue	185.375
GTEX-11ZU8-0008-SM-5S2VO	Skin	164.358
GTEX-14ASI-0011-R6a-SM-5S2UZ	Brain	5.59098
GTEX-ZG7Y-1626-SM-5S2NO	Adipose Tissue	147.156
GTEX-14A6H-1326-SM-5NQBC	Esophagus	61.1508
GTEX-12ZZY-0526-SM-5EQ5H	Blood Vessel	233.067
GTEX-1211K-1826-SM-5EGJ2	Colon	82.8024
GTEX-QMRM-0826-SM-3NB33	Lung	37.1399
GTEX-WFJO-0326-SM-3GIL3	Lung	22.211
GTEX-QESD-1626-SM-2S1RB	Muscle	40.002
GTEX-13OW6-0011-R2a-SM-5L3HG	Brain	4.08094
GTEX-13FTW-1726-SM-5KM2B	Stomach	3.03101
GTEX-11EQ8-1426-SM-5EGJR	Testis	7.99113
GTEX-ZQUD-1726-SM-51MRQ	Muscle	8.88086
GTEX-12C56-1126-SM-5FQTO	Esophagus	31.9512
GTEX-WYBS-0426-SM-3NM9M	Blood Vessel	88.7515
GTEX-WYJK-0326-SM-3NMA8	Nerve	62.1292
K-562-SM-2D7VY	Bone Marrow	0.671007
GTEX-144GM-1626-SM-5O9AG	Esophagus	56.5322
GTEX-S95S-1626-SM-2XCDJ	Blood Vessel	52.7098
GTEX-ZVP2-1326-SM-57WCE	Esophagus	6.12114
GTEX-QV31-1626-SM-2S1QC	Blood Vessel	86.7926
GTEX-W5X1-2826-SM-3GILM	Nerve	319.019
GTEX-13O3Q-2626-SM-5KM3S	Nerve	241.252
GTEX-ZG7Y-0006-SM-4WWEA	Blood	0.231006
GTEX-13OVL-3026-SM-5IJF1	Brain	3.15098
GTEX-Y3I4-1626-SM-4TT7W	Stomach	33.232
GTEX-13SLX-0526-SM-5S2ON	Skin	258.999
GTEX-RU1J-0426-SM-46MUK	Esophagus	37.1116
GTEX-148VI-1226-SM-5RQJR	Esophagus	152.853
GTEX-ZPU1-0726-SM-5HL6O	Heart	61.1212
GTEX-S7SE-0526-SM-2XCD8	Blood Vessel	96.8312
GTEX-ZPU1-1326-SM-57WE1	Esophagus	64.6106
GTEX-12ZZX-2926-SM-5GCOQ	Brain	6.49082
GTEX-13FTW-0526-SM-5IFIP	Pancreas	24.701
GTEX-11ONC-3026-SM-5985W	Brain	3.21095
GTEX-ZLWG-0526-SM-4WWFB	Thyroid	115.929
GTEX-11DYG-1326-SM-5N9DO	Esophagus	110.953
GTEX-QV31-0126-SM-447BP	Spleen	142.904
GTEX-ZDXO-0126-SM-5S2ND	Breast	284.602
GTEX-XBEW-0006-SM-4AT4E	Blood	0.201005
GTEX-XUJ4-1726-SM-4BONW	Adipose Tissue	152.25
GTEX-14BMV-2226-SM-5RQHX	Stomach	133.788
GTEX-P4QT-1626-SM-5S2UR	Muscle	10.1408
GTEX-U8T8-0126-SM-3DB94	Skin	86.3306
GTEX-ZAB4-0626-SM-5CVN3	Lung	84.0689
GTEX-X88G-0008-SM-47JWN	Skin	281.092
GTEX-OXRK-0226-SM-2YUN1	Skin	91.6524
GTEX-P4PP-3026-SM-3P61O	Blood Vessel	302.25
GTEX-WYJK-1926-SM-4ONDP	Esophagus	17.7605
GTEX-133LE-1426-SM-5IFH1	Small Intestine	31.4306
GTEX-11DXY-1626-SM-5H12L	Adrenal Gland	158.98
GTEX-Q2AI-0008-SM-48U2H	Skin	13.2608
GTEX-P4PQ-1626-SM-2HMKK	Muscle	24.6309
GTEX-ZE9C-2526-SM-5IJDR	Skin	23.9807
GTEX-XXEK-2026-SM-4BRVE	Heart	62.8221
GTEX-11NSD-0526-SM-5A5LT	Pancreas	40.23
GTEX-13JUV-2826-SM-5LZWU	Adipose Tissue	364.077
GTEX-WHPG-1326-SM-4M1ZJ	Esophagus	43.7709
GTEX-QVJO-0011-R1A-SM-2S1QI	Brain	26.3202
GTEX-11P81-0126-SM-5HL5Y	Thyroid	72.8017
GTEX-U3ZH-0326-SM-4WWDX	Heart	48.9013
GTEX-ZGAY-2226-SM-4YCCX	Vagina	153.065
GTEX-132AR-1126-SM-5P9GA	Thyroid	142.815
GTEX-ZTSS-0008-SM-4YCE8	Skin	109.38
GTEX-W5X1-0226-SM-5CHTO	Pancreas	0.000999989
GTEX-1399R-2726-SM-5IJBA	Skin	36.7915
GTEX-WOFM-1126-SM-4OOSB	Testis	6.201
GTEX-Y114-1226-SM-4TT88	Stomach	42.6301
GTEX-13D11-0526-SM-5LZYM	Adipose Tissue	66.211
GTEX-XMD1-2926-SM-4AT42	Brain	28.4213
GTEX-1399R-0826-SM-5IJEL	Esophagus	34.4015
GTEX-13VXU-1926-SM-5LU5J	Blood Vessel	354.244
GTEX-11O72-0008-SM-5Q5DN	Skin	100.971
GTEX-145ME-1726-SM-5Q5EU	Skin	131.061
GTEX-13NYS-0426-SM-5MR4X	Nerve	90.0092
GTEX-131XH-0006-SM-5O98V	Blood	0.600985
GTEX-13FTW-1226-SM-5LZZ1	Prostate	19.1809
GTEX-N7MT-1126-SM-2YUNQ	Brain	9.8512
GTEX-WHSB-0726-SM-4M1XQ	Pancreas	21.6906
GTEX-WHSE-0126-SM-3NMBT	Skin	68.6887
GTEX-Y5V6-1926-SM-5IFIL	Adrenal Gland	34.4707
GTEX-S7SE-0011-R2A-SM-2XCDC	Brain	15.1306
GTEX-13QBU-1126-SM-5LU44	Stomach	12.8109
GTEX-148VJ-2926-SM-5Q5DA	Pituitary	3.35102
GTEX-Y3IK-1126-SM-51MSV	Esophagus	16.4407
GTEX-117YX-0726-SM-5GIET	Adipose Tissue	381.172
GTEX-1339X-0726-SM-5L3FF	Adipose Tissue	139.469
GTEX-139TS-2826-SM-5J1OO	Skin	101.8
GTEX-WK11-1026-SM-4OOS8	Esophagus	72.6102
GTEX-13FLW-0011-R5a-SM-5LZX6	Brain	10.091
GTEX-VJWN-0626-SM-3NMAN	Blood Vessel	130.228
GTEX-R55F-1726-SM-2TF4R	Breast	294.21
GTEX-Y114-2526-SM-4TT8M	Muscle	13.2315
GTEX-X4EP-0005-SM-3P5ZE	Blood	0.110998
GTEX-OIZI-1426-SM-3NB1T	Esophagus	33.2804
GTEX-WYJK-1226-SM-4ONCP	Blood Vessel	77.3913
GTEX-U3ZM-0426-SM-59HKR	Lung	29.2304
GTEX-13FHP-0826-SM-5K7V5	Heart	119.893
GTEX-T2IS-0426-SM-32QPE	Heart	43.6497
GTEX-117YW-0426-SM-5GZZZ	Heart	23.0917
GTEX-ZDTS-0526-SM-4WKH9	Muscle	27.2107
GTEX-RWSA-2026-SM-47JX8	Prostate	20.5804
GTEX-13X6K-0011-R6a-SM-5P9K6	Brain	7.7109
GTEX-QDT8-0011-R11A-SM-32PKD	Brain	1.71095
GTEX-13OVG-1426-SM-5K7VP	Colon	122.497
GTEX-Y111-0008-SM-4SOJ3	Skin	60.3089
GTEX-131XE-1926-SM-5IFER	Pancreas	78.7332
GTEX-SJXC-0126-SM-2XCFF	Skin	142.419
GTEX-WQUQ-1426-SM-3MJFD	Heart	41.921
GTEX-XBED-2026-SM-4AT5D	Testis	7.0109
GTEX-11UD2-0626-SM-5GU6L	Thyroid	59.9007
GTEX-14ABY-0011-R4b-SM-5S2VN	Brain	7.74089
GTEX-T2IS-1126-SM-4DM6Z	Nerve	217.776
GTEX-XBEW-1026-SM-4QARV	Muscle	6.85093
GTEX-131YS-3126-SM-5KLYT	Brain	6.71087
GTEX-WRHU-1226-SM-4E3IJ	Heart	25.2008
GTEX-11DXX-0826-SM-5GZZP	Blood Vessel	146.993
GTEX-OHPL-1326-SM-3MJGG	Adrenal Gland	47.7822
GTEX-S4UY-0926-SM-4AD6O	Bladder	29.6611
GTEX-13G51-3126-SM-5IJG7	Brain	4.07105
GTEX-12126-0326-SM-5PNW3	Skin	77.1022
GTEX-XOTO-2826-SM-4B65I	Prostate	16.971
GTEX-13N1W-0726-SM-5MR57	Lung	35.1219
GTEX-12C56-1926-SM-5FQUG	Muscle	19.411
GTEX-ZYWO-2226-SM-5GZXR	Skin	48.8911
GTEX-11P81-0726-SM-5PNYH	Adipose Tissue	363.094
K-562-SM-5Q59U	Bone Marrow	0.141003
GTEX-PWCY-2026-SM-5Q5BF	Muscle	7.18108
GTEX-X585-0011-R8A-SM-46MUX	Brain	5.11098
GTEX-U3ZG-0008-SM-47JWL	Skin	116.485
GTEX-Y5LM-1926-SM-5RQJH	Skin	29.9005
GTEX-139TT-0226-SM-5K7YH	Adipose Tissue	382.947
GTEX-ZUA1-2626-SM-5NQ92	Skin	140.118
GTEX-12WSM-0005-SM-5NQB3	Blood	0.330999
GTEX-XUZC-0726-SM-4BOPH	Stomach	2.53099
GTEX-11NV4-2026-SM-5N9DG	Breast	416.45
GTEX-11I78-0005-SM-5N9GB	Blood	0.0909993
GTEX-139D8-2526-SM-5N9G3	Uterus	391.264
GTEX-13PVR-1026-SM-5QGQW	Heart	21.2604
GTEX-XBEW-0826-SM-4QASQ	Blood Vessel	5.80099
GTEX-Y3I4-0526-SM-4TT6X	Heart	32.2315
GTEX-YB5E-1526-SM-5IFIE	Small Intestine	14.1615
GTEX-12WSL-0626-SM-5GCOY	Thyroid	96.8916
GTEX-ZVT3-1626-SM-5GU66	Liver	135.627
GTEX-13O3O-3126-SM-5KM3H	Brain	1.84101
GTEX-145LU-0526-SM-5O9AT	Lung	90.5913
GTEX-PLZ4-0126-SM-2S1OG	Skin	205.017
GTEX-13FTY-0326-SM-5L3DN	Nerve	242.191
GTEX-QCQG-0008-SM-48U2G	Skin	134.877
GTEX-NPJ8-0011-R4a-SM-2HML3	Brain	3.88092
GTEX-13VXT-0005-SM-5N9F3	Blood	0.061002
GTEX-12ZZZ-0011-R3b-SM-5DUXK	Brain	5.46113
GTEX-13IVO-0926-SM-5KLZP	Thyroid	107.002
GTEX-ZYFG-1226-SM-5GIC7	Esophagus	67.1307
GTEX-1399R-2126-SM-5K7WZ	Colon	147.892
GTEX-13FXS-0011-R6b-SM-5L3F7	Brain	5.99101
GTEX-RWS6-2126-SM-2XCAV	Muscle	13.151
GTEX-11EQ9-0826-SM-5986Y	Esophagus	27.8711
GTEX-OHPN-0005-SM-2YUML	Blood	0.190994
GTEX-13FTW-0926-SM-5J2NJ	Blood Vessel	101.069
GTEX-QDVN-0626-SM-2I3FP	Thyroid	97.9043
GTEX-139TS-3126-SM-5LZWX	Brain	3.83094
GTEX-145ME-1326-SM-5O98Q	Uterus	360.536
GTEX-13X6K-2126-SM-5O9D4	Esophagus	40.642
GTEX-ZTPG-0006-SM-4YCFG	Blood	0.130996
GTEX-X4XX-0011-R3B-SM-46MWK	Brain	5.21114
GTEX-YB5E-1726-SM-5IFJ3	Breast	67.4619
GTEX-12C56-0526-SM-5FQST	Stomach	47.3306
GTEX-QDVJ-0005-SM-2TC5X	Blood	1.18099
GTEX-T6MO-0003-SM-3NMAG	Blood	0.280992
GTEX-Q734-1626-SM-48U1B	Uterus	292.562
GTEX-12WSG-2126-SM-5EGJ7	Uterus	185.696
GTEX-13O61-1726-SM-5KM46	Prostate	35.3907
GTEX-12WSK-0426-SM-5GCNS	Blood Vessel	43.3512
GTEX-ZG7Y-1126-SM-4WWEZ	Esophagus	9.66118
GTEX-ZF28-0011-R10a-SM-4WWEH	Brain	4.53091
GTEX-ZVT2-0626-SM-5GICR	Vagina	96.0824
GTEX-S32W-1326-SM-4AD5Q	Fallopian Tube	52.4911
GTEX-XV7Q-2226-SM-4BRVY	Colon	114.571
GTEX-113JC-2326-SM-5EQ4E	Skin	172.733
K-562-SM-3P61Y	Bone Marrow	0.0710018
GTEX-13D11-0426-SM-5LZYA	Adrenal Gland	30.0314
K-562-SM-4WWAK	Bone Marrow	0.061002
GTEX-12WSB-0426-SM-5BC6H	Nerve	185.079
GTEX-139TT-0011-R7b-SM-5J2MN	Brain	5.73105
GTEX-11NSD-0326-SM-5A5LS	Lung	23.9607
GTEX-13CF3-1926-SM-5K7WF	Stomach	3.43093
GTEX-OHPL-0008-SM-4E3I9	Skin	369.083
GTEX-Y8DK-0011-R1A-SM-4RGLO	Brain	3.13095
GTEX-13SLX-0011-R9b-SM-5SI6X	Brain	10.9207
GTEX-11TUW-2726-SM-5EQLC	Skin	98.4828
GTEX-ZAJG-2826-SM-5HL8D	Uterus	90.8113
GTEX-QV31-1026-SM-4R1K3	Prostate	27.0208
GTEX-OXRO-1226-SM-48TDL	Thyroid	76.0196
GTEX-ZF29-2126-SM-4WWB8	Salivary Gland	25.5102
GTEX-11WQC-0626-SM-5EQMF	Lung	63.2591
GTEX-XLM4-2026-SM-4AT4X	Heart	38.6501
GTEX-13W46-1826-SM-5K7VA	Blood Vessel	116.857
GTEX-QDT8-0326-SM-32PL1	Nerve	231.907
GTEX-RUSQ-1526-SM-2TF62	Skin	47.1995
GTEX-1211K-1226-SM-5EQ4N	Adipose Tissue	54.4402
GTEX-1313W-1426-SM-5KLZU	Heart	54.5006
GTEX-1399S-2726-SM-5KM22	Muscle	11.1409
GTEX-SIU8-0226-SM-2XCDS	Adipose Tissue	345.849
GTEX-N7MT-0126-SM-26GMB	Lung	136.004
GTEX-XQ3S-1126-SM-4BOPK	Esophagus	33.3612
GTEX-QCQG-0426-SM-48U29	Pancreas	45.8103
GTEX-NL3H-0011-R6a-SM-2I3G8	Brain	5.33098
GTEX-14A5H-0826-SM-5QGPJ	Skin	187.663
GTEX-PWCY-0008-SM-48TE9	Skin	124.837
GTEX-11P7K-2226-SM-5GU56	Nerve	90.9121
GTEX-12WSN-1426-SM-5GCO6	Skin	260.276
GTEX-11TT1-0526-SM-5P9JO	Esophagus	15.6512
GTEX-13OVJ-1826-SM-5KM2D	Colon	116.324
GTEX-ZVT2-0926-SM-5GICE	Heart	41.4299
GTEX-ZZPU-0326-SM-5N9BJ	Adipose Tissue	690.74
GTEX-ZVE2-1826-SM-51MRZ	Adipose Tissue	429.079
GTEX-P44G-0011-R7A-SM-2I3F9	Brain	1.37097
GTEX-QVJO-0011-R5A-SM-2S1QM	Brain	19.2208
GTEX-ZAB4-1926-SM-57WD8	Blood Vessel	54.3422
GTEX-13SLX-0926-SM-5S2NM	Heart	152.282
GTEX-RNOR-0126-SM-2TF57	Skin	123.528
GTEX-144GL-0011-R3a-SM-5P9HP	Brain	8.74101
GTEX-NPJ8-1526-SM-26GMH	Brain	2.77099
GTEX-YFC4-0008-SM-4RGM3	Skin	542.997
GTEX-139UC-0011-R9a-SM-5K7W7	Brain	32.431
GTEX-11O72-2926-SM-5BC4V	Brain	5.57086
GTEX-ZF28-0726-SM-4WKFU	Lung	138.39
GTEX-X4EP-0008-SM-4PQYO	Skin	180.556
GTEX-12WSD-1626-SM-5GCNR	Pancreas	39.7918
GTEX-13CF2-0011-R8b-SM-5IJCX	Brain	8.96125
GTEX-13PVQ-0526-SM-5LU8Q	Blood Vessel	235.797
GTEX-14E6C-0226-SM-5S2N3	Adipose Tissue	312.194
GTEX-14E6C-2626-SM-5RQJP	Thyroid	161.916
GTEX-QDVN-2426-SM-2S1Q4	Muscle	29.4317
GTEX-1211K-0326-SM-5FQT1	Blood Vessel	133.88
GTEX-ZAJG-0626-SM-5HL8X	Breast	291.368
GTEX-13D11-2026-SM-5IJBK	Esophagus	71.9189
GTEX-XXEK-1826-SM-4BRVC	Colon	61.1593
GTEX-11I78-1326-SM-5PNY9	Colon	39.0108
GTEX-12WSK-1526-SM-5CVNO	Small Intestine	71.042
GTEX-V1D1-1926-SM-4JBGX	Prostate	8.6608
GTEX-139TT-0126-SM-5K7Y5	Skin	253.352
GTEX-13W3W-2126-SM-5K7UX	Colon	100.734
GTEX-11PRG-2026-SM-5GU5F	Colon	378.828
GTEX-TMZS-0008-SM-47JWM	Skin	721.822
GTEX-11OF3-0011-R7a-SM-57WCG	Brain	10.7309
GTEX-132AR-0526-SM-5J2MJ	Adipose Tissue	541.869
GTEX-T5JW-0726-SM-4DM6D	Cervix Uteri	138.007
GTEX-ZTPG-1426-SM-51MT3	Liver	20.8114
GTEX-14H4A-0226-SM-5SI6Q	Adrenal Gland	37.0705
GTEX-NPJ8-1826-SM-2YUNC	Blood Vessel	67.4431
GTEX-13OVL-1426-SM-5IJC1	Muscle	34.5114
GTEX-12584-0011-R6a-SM-5NQ7C	Brain	1.87099
GTEX-NPJ8-0007-SM-2D7VX	Blood	0.0309997
GTEX-ZAB4-0826-SM-5LU9D	Liver	106.854
GTEX-13N1W-0011-R5b-SM-5MR5Q	Brain	6.3612
GTEX-11TUW-1326-SM-5EQKV	Esophagus	19.5812
GTEX-132AR-1326-SM-5K7YC	Blood Vessel	239.088
GTEX-13CF3-0426-SM-5IJEU	Lung	95.1809
GTEX-111FC-2526-SM-5GZXU	Skin	181.472
GTEX-131YS-2226-SM-5P9G8	Ovary	87.724
GTEX-VUSH-0008-SM-47JWK	Skin	641.098
GTEX-ZUA1-1526-SM-59HLS	Breast	264.001
GTEX-13D11-0326-SM-5LZXX	Lung	54.7201
GTEX-13QBU-0926-SM-5K7WQ	Esophagus	74.9419
GTEX-11NSD-2026-SM-5HL5U	Muscle	8.39075
GTEX-11ZTS-0011-R1a-SM-5BC71	Brain	6.3612
GTEX-WY7C-1726-SM-4ONCC	Stomach	7.1211
GTEX-12WSL-2826-SM-5LZWL	Nerve	52.2913
GTEX-145LS-0011-R1b-SM-5PNUP	Brain	15.8115
GTEX-UJMC-0526-SM-3GAE3	Heart	29.692
GTEX-11GSP-0011-R5a-SM-57WBE	Brain	9.17113
GTEX-139T6-1026-SM-5IJGC	Small Intestine	26.0914
GTEX-YJ89-0008-SM-4RGM4	Skin	86.5583
GTEX-X15G-0426-SM-4PQZ6	Heart	53.5717
GTEX-PLZ5-0326-SM-3P614	Adrenal Gland	11.831
GTEX-WHPG-0626-SM-3NMBD	Adipose Tissue	295.743
GTEX-11WQC-0006-SM-5LZVP	Blood	0.201005
GTEX-QLQ7-1026-SM-447BB	Esophagus	143.181
GTEX-1399R-1726-SM-5K7YJ	Heart	58.5501
GTEX-111VG-1626-SM-5EGIO	Skin	14.5909
GTEX-WL46-0426-SM-3TW8J	Nerve	415.067
GTEX-145MN-1426-SM-5SI9H	Pancreas	45.1014
GTEX-YJ8O-0126-SM-5QGRG	Blood Vessel	197.143
GTEX-QEG5-0626-SM-2S1PP	Blood Vessel	100.218
GTEX-SJXC-0526-SM-2XCFG	Muscle	53.3716
GTEX-14A6H-2826-SM-5QGPM	Muscle	35.5111
GTEX-14A5H-0226-SM-5S2VK	Blood Vessel	269.773
GTEX-145MH-0011-R10b-SM-5PNUK	Brain	5.53085
GTEX-WY7C-0926-SM-3NB34	Adipose Tissue	301.894
GTEX-OIZH-1626-SM-2HMKI	Muscle	9.78112
GTEX-WI4N-0008-SM-4OOSV	Skin	1135.88
GTEX-13OVG-0005-SM-5P9HA	Blood	0.0309997
GTEX-13S86-2326-SM-5RQK1	Muscle	47.8916
GTEX-1339X-0326-SM-5K7Z8	Heart	26.6507
GTEX-13O61-2026-SM-5J2M6	Testis	7.70076
GTEX-13QIC-0011-R11b-SM-5O9BU	Brain	3.80106
GTEX-11ZTS-0526-SM-5CVL9	Muscle	28.6607
GTEX-12WSL-0326-SM-5CVMK	Adrenal Gland	25.4413
GTEX-13U4I-1826-SM-5IJD2	Muscle	37.2715
GTEX-11NV4-1926-SM-5N9D4	Salivary Gland	116.655
GTEX-SE5C-0726-SM-4BRWY	Thyroid	42.2213
GTEX-13JUV-2426-SM-5J1NS	Blood Vessel	100.761
GTEX-12696-0326-SM-5EGL4	Thyroid	45.0608
GTEX-Q2AG-0011-R1A-SM-2HMJI	Brain	8.23118
GTEX-13FHO-2826-SM-5K7ZA	Prostate	75.051
GTEX-14BIM-3126-SM-5Q5C7	Brain	6.47105
GTEX-145LS-0011-R4b-SM-5S2UT	Brain	16.0411
GTEX-XBEC-0006-SM-4AT5T	Blood	0.171004
GTEX-XXEK-0926-SM-4BRWH	Heart	19.1212
GTEX-T2YK-2226-SM-32QPT	Breast	239.835
GTEX-147GR-2926-SM-5RQIN	Pituitary	83.7896
GTEX-12WS9-0426-SM-59HJW	Nerve	57.3412
GTEX-13OW8-1026-SM-5J1NQ	Skin	107.934
GTEX-11EM3-0001-SM-5Q5BD	Blood	0.251007
GTEX-X62O-0005-SM-46MV1	Blood	0.280992
GTEX-12696-0926-SM-5FQTV	Kidney	63.8715
GTEX-WFON-0326-SM-3GIKX	Heart	25.6005
GTEX-13NYB-0326-SM-5IJDP	Heart	85.7402
GTEX-13N2G-0011-R4b-SM-5MR54	Brain	10.1211
GTEX-VJYA-1526-SM-3GIJV	Skin	369.313
GTEX-11OF3-1726-SM-5GU5Q	Prostate	123.889
GTEX-P44G-0011-R2A-SM-2XCD2	Brain	1.95098
GTEX-ZF29-2226-SM-4WWB9	Adipose Tissue	88.224
GTEX-Y9LG-0001-SM-4VBRQ	Blood	0.710989
GTEX-13PL7-2326-SM-5L3FY	Ovary	19.9014
GTEX-139T8-0626-SM-5KLZX	Skin	96.6501
GTEX-RU72-1426-SM-46MUF	Liver	43.2522
GTEX-R55G-0926-SM-48FDN	Esophagus	49.7906
GTEX-1269C-2426-SM-5FQSN	Breast	166.03
GTEX-132QS-0526-SM-5IJC7	Heart	32.0911
GTEX-S3XE-1726-SM-3K2AM	Skin	13.5611
GTEX-WL46-0526-SM-3LK7W	Blood Vessel	155.719
GTEX-14BMU-1226-SM-5S2OR	Skin	49.2209
GTEX-13SLW-0011-R4b-SM-5S2W2	Brain	11.1009
GTEX-13JVG-0126-SM-5L3D3	Muscle	21.1707
GTEX-WXYG-1626-SM-4ONCR	Stomach	4.7509
GTEX-111CU-1126-SM-5EGIM	Skin	22.4011
GTEX-N7MS-0011-R10A-SM-2HMJK	Brain	6.85093
GTEX-14DAR-1926-SM-5S2NQ	Adipose Tissue	72.2487
GTEX-YEC4-1026-101814-SM-5P9FX	<not provided>	6.80078
GTEX-XOT4-0826-SM-4B66Y	Adipose Tissue	344.581
GTEX-YJ8O-2226-SM-5IFHW	Breast	305.452
GTEX-WHWD-0003-SM-4M1ZS	Blood	4.29096
GTEX-ZVT3-0011-R8b-SM-57WDJ	Brain	12.0411
GTEX-132AR-1526-SM-5KM1L	Uterus	175.874
GTEX-PWCY-0526-SM-5P9HG	Heart	40.002
GTEX-117YX-2226-SM-5EGJJ	Adipose Tissue	93.0478
GTEX-WYJK-0008-SM-4ONDV	Skin	191.726
GTEX-XYKS-1226-SM-4BRVI	Pancreas	49.7526
GTEX-Y3I4-0726-SM-4TT7M	Adipose Tissue	126.168
GTEX-13X6K-0011-R10a-SM-5P9JR	Brain	5.54082
GTEX-11LCK-1026-SM-5A5KB	Skin	32.5616
GTEX-ZVZP-1626-SM-5GIDJ	Esophagus	44.8613
GTEX-ZQG8-1026-SM-51MR9	Adipose Tissue	128.409
GTEX-13PVQ-2726-SM-5L3H7	Colon	103.093
GTEX-14E6E-2226-SM-5SI6F	Nerve	134.802
GTEX-13G51-0011-R2b-SM-5LZXS	Brain	13.981
GTEX-11TUW-0008-SM-5SI6S	Skin	355.326
GTEX-QMRM-1726-SM-2S1QG	Adipose Tissue	251.306
GTEX-13OW7-0626-SM-5K7UD	Blood Vessel	103.645
GTEX-1192X-0726-SM-5987R	Heart	61.0492
GTEX-S3XE-0826-SM-4AD4U	Esophagus	80.5716
GTEX-QVUS-0426-SM-48FE3	Blood Vessel	207.059
GTEX-ZDYS-2526-SM-4WKGU	Pancreas	33.1905
GTEX-117YW-2026-SM-5N9BH	Esophagus	148.323
GTEX-13112-0011-R1b-SM-5HL7K	Brain	2.841
GTEX-OOBK-0425-SM-3LK5O	Blood Vessel	326.672
GTEX-S4Z8-0826-SM-4AD4J	Esophagus	148.921
GTEX-11P81-2626-SM-5GU6T	Nerve	150.394
GTEX-Y5V6-2826-SM-4VDSF	Blood Vessel	73.2319
GTEX-X5EB-1026-SM-46MVU	Esophagus	35.8798
GTEX-1212Z-0826-SM-5EQ51	Blood Vessel	91.234
GTEX-1477Z-0626-SM-5NQB7	Lung	45.1014
GTEX-145MG-0826-SM-5Q5C2	Thyroid	117.141
GTEX-OIZG-0426-SM-3LK5W	Blood Vessel	196.352
GTEX-S341-1126-SM-4AD6T	Cervix Uteri	296.626
GTEX-ZF2S-1026-SM-4WWB1	Heart	36.7507
GTEX-13OVH-1126-SM-5K7YP	Adipose Tissue	226.929
GTEX-X15G-1926-SM-4PQZQ	Vagina	219.58
GTEX-N7MS-0011-R5a-SM-2HMK8	Brain	8.51083
GTEX-13OVJ-0011-R10b-SM-5L3HT	Brain	3.60101
GTEX-POMQ-1426-SM-3P61D	Ovary	153.65
GTEX-ZYFD-3126-SM-5E44O	Pituitary	50.1821
GTEX-11DYG-1926-SM-5H12I	Esophagus	161.972
GTEX-ZLV1-0005-SM-4WWAP	Blood	0.110998
GTEX-XV7Q-1526-SM-4BRWB	Uterus	130.355
GTEX-N7MT-0126-SM-26GMS	Lung	12.4909
GTEX-QEG5-1426-SM-447AS	Esophagus	27.7017
GTEX-T5JC-0001-SM-3NMAK	Blood	0.251007
GTEX-WQUQ-1926-SM-4OOSA	Liver	27.6901
GTEX-OXRL-0426-SM-3NM97	Blood Vessel	233.552
GTEX-PWCY-0526-SM-5PNU8	Heart	40.8199
GTEX-PLZ4-0008-SM-48TE6	Skin	82.0425
GTEX-WVLH-0011-R10A-SM-3MJFM	Brain	6.85093
GTEX-X5EB-0726-SM-46MVR	Thyroid	57.8602
GTEX-13CZV-0006-SM-5P9IN	Blood	0.0209995
GTEX-TMMY-0226-SM-33HBA	Skin	24.4218
GTEX-13VXU-0011-R3b-SM-5O9CU	Brain	6.90097
GTEX-12WSE-0011-R10b-SM-5P9JV	Brain	4.15112
GTEX-ZP4G-1026-SM-4YCE1	Esophagus	138.266
GTEX-OHPJ-1026-SM-2HMLE	Lung	40.4705
K-562-SM-4QAR5	Bone Marrow	0.220997
GTEX-14A5H-0006-SM-5O9AI	Blood	0.891002
GTEX-13FLV-0326-SM-5N9DJ	Liver	81.8097
GTEX-ZVZQ-0006-SM-51MR8	Blood	0.501006
GTEX-OIZH-0226-SM-2YUMH	Adipose Tissue	133.177
GTEX-146FR-1326-SM-5SIAJ	Skin	43.8225
GTEX-Y5V6-0326-SM-4VBRW	Blood Vessel	193.019
GTEX-OHPK-1826-SM-2YUMR	Blood Vessel	59.5901
GTEX-YEC3-1426-101806-SM-5PNXX	<not provided>	32.6203
GTEX-QMR6-0011-R10A-SM-32PKO	Brain	4.00111
GTEX-W5WG-1626-SM-4LMKG	Esophagus	5.49112
GTEX-11EM3-1126-SM-5A5KM	Adipose Tissue	73.8128
GTEX-ZVP2-2226-SM-5GU6Q	Blood Vessel	87.1785
GTEX-13O3Q-0626-SM-5IJG1	Thyroid	117.588
GTEX-13FTY-0011-R1a-SM-5LZXE	Brain	2.39098
GTEX-OHPM-0226-SM-3LK61	Adipose Tissue	120.685
GTEX-11WQK-0326-SM-5EQL1	Blood Vessel	42.6508
GTEX-X4EO-0926-SM-3P5Z2	Lung	84.1505
GTEX-ZF2S-1526-SM-5S2OO	Adipose Tissue	157.466
GTEX-U8XE-2526-SM-4E3IT	Prostate	36.9218
GTEX-ZZ64-0826-SM-5E449	Colon	66.5515
GTEX-13W3W-1026-SM-5IFG4	Pancreas	44.6225
GTEX-11ZU8-1126-SM-5EQ5K	Colon	82.9402
GTEX-139TU-0011-R5b-SM-5L3E1	Brain	8.61111
GTEX-ZVTK-0326-SM-51MRR	Breast	268.392
GTEX-13NZB-0226-SM-5KM1T	Heart	39.7422
GTEX-144GN-0626-SM-5O9B2	Esophagus	11.1409
GTEX-SE5C-0426-SM-4BRUI	Blood Vessel	71.2096
GTEX-QDVN-0726-SM-4B64L	Lung	43.1713
GTEX-U3ZN-0826-SM-4DXSZ	Adrenal Gland	21.4009
GTEX-UJHI-1626-SM-3DB9A	Adipose Tissue	190.217
GTEX-13111-2326-SM-5LZUQ	Salivary Gland	208.905
GTEX-Y114-2626-SM-4TT8Y	Nerve	86.3126
GTEX-11EI6-3126-SM-5H111	Pituitary	67.4291
GTEX-13NZB-2626-SM-5J2M7	Muscle	11.7111
GTEX-12WSD-0326-SM-59HKP	Nerve	239.088
GTEX-ZLV1-1826-SM-5FQU5	Adipose Tissue	152.303
GTEX-111YS-0006-SM-5NQBE	Blood	0.061002
GTEX-S3XE-0926-SM-4AD4S	Esophagus	14.9306
GTEX-XUZC-1026-SM-4BOPY	Ovary	35.8301
[truncated: 5,863 more rows]
